# Supplementary material for: Genome-Wide Identification, Evolution, and Expression Analysis of the ATP-Binding Cassette Transporter Gene Family in Brassica rapa
Source: Front Plant Sci. 2017 Mar 17;8:349. doi: 10.3389/fpls.2017.00349 (PMC5355449; doi:10.3389/fpls.2017.00349)
Supplement: Supplementary file 2 [file Table1.XLSX]

## Sheet: S1
Supplementary Table 1 The list of ABCs identified in P. trichocarpa, G. max, A. lyrate, C. papaya, V. vinifera, B. distachyon, O. sativa and A. trichopoda in this study.
P. trichocarpa		G. max		A. lyrate		C. papaya		V. vinifera		B. distachyon		O. sativa		A. trichopoda
Subfamily	Gene ID	Subfamily	Gene ID	Subfamily	Gene ID	Subfamily	Gene ID	Subfamily	Gene ID	Subfamily	Gene ID	Subfamily	Gene ID	Subfamily	Gene ID
ABCA	Potri.006G049300.1	ABCA	Glyma.03G136000.1.p	ABCA	496340	ABCA	evm.model.supercontig_224.8	ABCA	GSVIVT01033258001	ABCA	Bradi3g35400.1.p	ABCA	LOC_Os08g30740.1	ABCA	evm_27.model.AmTr_v1.0_scaffold00078.113
	Potri.012G069800.1		Glyma.04G173000.1.p		886412		evm.model.supercontig_107.110		GSVIVT01008042001		Bradi3g08020.1.p		LOC_Os02g11960.1		evm_27.model.AmTr_v1.0_scaffold00078.116
	Potri.015G063500.1		Glyma.06G191300.1.p		485139		evm.model.supercontig_388.1		GSVIVT01025902001		Bradi1g37230.1.p		LOC_Os02g01820.1		evm_27.model.AmTr_v1.0_scaffold00159.25
	Potri.013G123300.1		Glyma.05G028500.1.p		485137		evm.model.supercontig_107.109		GSVIVT01008040001		Bradi3g35377.1.p		LOC_Os08g30780.1		evm_27.model.AmTr_v1.0_scaffold00078.112
	Potri.012G069700.1		Glyma.17G098300.1.p		485136		evm.model.supercontig_388.2		GSVIVT01029736001		Bradi3g35390.1.p		LOC_Os06g38950.1	ABCB	evm_27.model.AmTr_v1.0_scaffold00017.81
	Potri.015G063400.1		Glyma.04G172900.1.p		485138	ABCB	evm.model.supercontig_2.263	ABCB	GSVIVT01005757001		Bradi4g28617.1.p		LOC_Os08g30770.1		evm_27.model.AmTr_v1.0_scaffold00045.105
ABCB	Potri.013G160500.1		Glyma.06G191400.1.p		485140		evm.model.supercontig_107.1		GSVIVT01032404001	ABCB	Bradi1g63433.1.p	ABCB	LOC_Os04g33700.1		evm_27.model.AmTr_v1.0_scaffold00045.103
	Potri.019G132800.1		Glyma.U001700.1.p		496338		evm.model.supercontig_5.7		GSVIVT01033860001		Bradi4g03310.1.p		LOC_Os01g68330.1		evm_27.model.AmTr_v1.0_scaffold00010.381
	Potri.006G211700.1	ABCB	Glyma.10G073800.1.p		485135		evm.model.supercontig_33.17		GSVIVT01010634001		Bradi2g58380.1.p		LOC_Os06g03770.1		evm_27.model.AmTr_v1.0_scaffold00076.86
	Potri.015G059700.1		Glyma.01G026000.1.p		886414		evm.model.supercontig_130.80		GSVIVT01024527001		Bradi5g09380.1.p		LOC_Os08g05690.1		evm_27.model.AmTr_v1.0_scaffold00007.341
	Potri.015G059800.1		Glyma.02G038800.1.p		496336		evm.model.supercontig_94.77		GSVIVT01008121001		Bradi1g08280.1.p		LOC_Os08g05710.1		evm_27.model.AmTr_v1.0_scaffold00049.104
	Potri.015G059600.1		Glyma.16G071000.1.p		483249		evm.model.supercontig_3.192		GSVIVT01032898001		Bradi3g17010.1.p		LOC_Os07g28090.1		evm_27.model.AmTr_v1.0_scaffold00055.37
	Potri.018G051800.1		Glyma.09G147400.1.p	ABCB	490396		evm.model.supercontig_14.71		GSVIVT01038687001		Bradi3g17020.1.p		LOC_Os03g54790.1		evm_27.model.AmTr_v1.0_scaffold00018.113
	Potri.017G097200.1		Glyma.02G238300.1.p		470213		evm.model.supercontig_102.37		GSVIVT01016617001		Bradi1g28416.1.p		LOC_Os02g09720.1		evm_27.model.AmTr_v1.0_scaffold00056.104
	Potri.015G000200.1		Glyma.14G207200.1.p		483871		evm.model.supercontig_1.347		GSVIVT01025040001		Bradi1g72517.1.p		LOC_Os04g40570.1		evm_27.model.AmTr_v1.0_scaffold00145.27
	Potri.004G123000.1		Glyma.05G019400.1.p		493065		evm.model.supercontig_25.158		GSVIVT01036799001		Bradi5g13617.1.p		LOC_Os03g08380.1		evm_27.model.AmTr_v1.0_scaffold00018.111
	Potri.012G004200.1		Glyma.17G080400.1.p		486718		evm.model.supercontig_40.105		GSVIVT01036801001		Bradi2g48610.1.p		LOC_Os01g74470.1		evm_27.model.AmTr_v1.0_scaffold00048.15
	Potri.010G045900.1		Glyma.06G139500.1.p		494323		evm.model.supercontig_57.7		GSVIVT01032577001		Bradi5g12307.1.p		LOC_Os03g17180.1		evm_27.model.AmTr_v1.0_scaffold00090.97
	Potri.017G074000.1		Glyma.01G016500.1.p		888346		evm.model.supercontig_97.65		GSVIVT01007586001		Bradi3g12627.1.p		LOC_Os04g38570.1		evm_27.model.AmTr_v1.0_scaffold00005.211
	Potri.017G085000.1		Glyma.09G206300.1.p		492221		evm.model.supercontig_102.36		GSVIVT01000580001		Bradi2g62540.1.p		LOC_Os04g54930.1		evm_27.model.AmTr_v1.0_scaffold00047.188
	Potri.018G141300.1		Glyma.08G270300.1.p		484657		evm.model.supercontig_14.14		GSVIVT01014625001		Bradi1g66290.1.p		LOC_Os01g52550.1		evm_27.model.AmTr_v1.0_scaffold00069.114
	Potri.006G074000.1		Glyma.13G142100.1.p		902817		evm.model.supercontig_90.67		GSVIVT01017696001		Bradi3g06577.1.p		LOC_Os02g46680.1		evm_27.model.AmTr_v1.0_scaffold00031.74
	Potri.006G074400.1		Glyma.08G342600.1.p		473002		evm.model.supercontig_57.8		GSVIVT01028256001		Bradi3g52220.1.p		LOC_Os08g45030.1		evm_27.model.AmTr_v1.0_scaffold00077.187
	Potri.018G141400.1		Glyma.18G154200.1.p		472995	ABCC	evm.model.supercontig_12.183		GSVIVT01021365001		Bradi5g23600.1.p		LOC_Os02g21750.1	ABCC	evm_27.model.AmTr_v1.0_scaffold00092.15
	Potri.018G087100.1		Glyma.19G016700.1.p		485955		evm.model.supercontig_97.101		GSVIVT01021366001		Bradi2g20170.1.p		LOC_Os05g47490.1		evm_27.model.AmTr_v1.0_scaffold00065.213
	Potri.001G139600.1		Glyma.19G016400.1.p		482971		evm.model.supercontig_43.1		GSVIVT01036093001		Bradi2g20177.1.p		LOC_Os05g06190.1		evm_27.model.AmTr_v1.0_scaffold00045.309
	Potri.003G094400.1		Glyma.18G012700.1.p		905098		evm.model.supercontig_87.40		GSVIVT01037027001		Bradi2g47400.1.p		LOC_Os05g04610.1		evm_27.model.AmTr_v1.0_scaffold00045.310
	Potri.008G050400.1		Glyma.06G269300.1.p		484610		evm.TU.contig_33848.1		GSVIVT01032575001		Bradi2g47410.1.p		LOC_Os01g18670.1		evm_27.model.AmTr_v1.0_scaffold00056.230
	Potri.010G210100.1		Glyma.12G135300.1.p		905099		evm.model.supercontig_122.21		GSVIVT01032578001		Bradi2g11210.1.p		LOC_Os01g34970.1		evm_27.model.AmTr_v1.0_scaffold00263.2
	Potri.001G417600.1		Glyma.01G008200.1.p		865490		evm.model.supercontig_3.35		GSVIVT01015306001		Bradi2g36897.1.p		LOC_Os01g35030.1		evm_27.model.AmTr_v1.0_scaffold00056.233
	Potri.011G133800.1		Glyma.16G078100.1.p		476191		evm.model.supercontig_131.44		GSVIVT01016706001		Bradi3g10680.2.p		LOC_Os01g50080.1		evm_27.model.AmTr_v1.0_scaffold02462.1
	Potri.006G074100.1		Glyma.02G094800.1.p		492281		evm.model.supercontig_43.3		GSVIVT01011381001		Bradi2g17710.1.p		LOC_Os01g50100.1		evm_27.model.AmTr_v1.0_scaffold00056.227
	Potri.002G019600.1		Glyma.18G286600.1.p		494081		evm.TU.contig_47820.1		GSVIVT01033645001		Bradi2g17720.1.p		LOC_Os01g50160.1		evm_27.model.AmTr_v1.0_scaffold00056.228
	Potri.017G081100.1		Glyma.10G290800.1.p		487170		evm.model.supercontig_10.72		GSVIVT01009946001		Bradi3g20045.1.p		LOC_Os05g47500.1		evm_27.model.AmTr_v1.0_scaffold00053.36
	Potri.006G123900.1		Glyma.20G239800.1.p		495937		evm.model.supercontig_17.75		GSVIVT01013125001		Bradi2g47330.1.p	ABCC	LOC_Os02g18670.1		evm_27.model.AmTr_v1.0_scaffold00149.13
	Potri.016G093600.1		Glyma.03G183600.1.p		491900		evm.model.supercontig_17.74	ABCC	GSVIVT01014629001		Bradi2g47360.1.p		LOC_Os02g18700.1		evm_27.model.AmTr_v1.0_scaffold00039.122
	Potri.001G165000.1		Glyma.19G184300.1.p		491901	ABCD	evm.model.supercontig_230.3		GSVIVT01014633001		Bradi2g47337.2.p		LOC_Os01g07870.1		evm_27.model.AmTr_v1.0_scaffold00005.70
	Potri.001G139700.1		Glyma.10G055000.1.p	ABCC	313679		evm.model.supercontig_213.16		GSVIVT01014632001		Bradi2g47347.1.p		LOC_Os04g49890.1		evm_27.model.AmTr_v1.0_scaffold00090.108
	Potri.001G354900.1		Glyma.13G063700.1.p		890584		evm.model.supercontig_118.11		GSVIVT01014628001	ABCC	Bradi1g48697.2.p		LOC_Os04g49900.1		evm_27.model.AmTr_v1.0_scaffold00705.1
	Potri.002G187500.1		Glyma.19G021500.1.p		473263	ABCE	evm.model.supercontig_352.3		GSVIVT01037789001		Bradi1g48710.2.p		LOC_Os03g04920.1		evm_27.model.AmTr_v1.0_scaffold00090.107
	Potri.014G113100.1		Glyma.16G011000.1.p		482430		evm.model.supercontig_17.25		GSVIVT01014631001		Bradi1g48670.2.p		LOC_Os12g37580.1	ABCD	evm_27.model.AmTr_v1.0_scaffold00032.176
	Potri.014G113200.1		Glyma.14G220200.1.p		480238	ABCF	evm.model.supercontig_1.26		GSVIVT01028458001		Bradi3g00540.1.p		LOC_Os06g06440.1		evm_27.model.AmTr_v1.0_scaffold00071.217
	Potri.014G113500.1		Glyma.17G259100.1.p		873633		evm.model.supercontig_103.76		GSVIVT01028440001		Bradi1g75590.1.p		LOC_Os11g05700.1	ABCE	evm_27.model.AmTr_v1.0_scaffold00226.4
	Potri.010G003000.1		Glyma.19G016600.1.p		486382		evm.model.supercontig_1802.2		GSVIVT01028459001		Bradi5g19787.3.p		LOC_Os01g67580.1		evm_27.model.AmTr_v1.0_scaffold00066.5
	Potri.002G187400.1		Glyma.13G222000.1.p		483963		evm.TU.contig_37838.1		GSVIVT01010326001		Bradi2g04577.1.p		LOC_Os05g10730.1	ABCF	evm_27.model.AmTr_v1.0_scaffold00009.359
	Potri.014G113000.1		Glyma.15G090200.1.p		907845	ABCG	evm.model.supercontig_114.19		GSVIVT01018403001		Bradi4g39174.1.p		LOC_Os06g36650.1		evm_27.model.AmTr_v1.0_scaffold00072.127
ABCC	Potri.003G197300.1		Glyma.13G118500.1.p		486482		evm.model.supercontig_1.305		GSVIVT01028722001		Bradi2g00417.1.p		LOC_Os01g25386.1		evm_27.model.AmTr_v1.0_scaffold00002.474
	Potri.003G198400.1		Glyma.17G041400.1.p		887574		evm.model.supercontig_3.375		GSVIVT01028744001		Bradi2g57900.1.p		LOC_Os04g13210.1		evm_27.model.AmTr_v1.0_scaffold00049.22
	Potri.001G362300.1		Glyma.13G118600.1.p		478682		evm.model.supercontig_755.4		GSVIVT01019467001		Bradi2g33210.1.p		LOC_Os04g13220.1		evm_27.model.AmTr_v1.0_scaffold00010.339
	Potri.001G362200.1		Glyma.17G041300.1.p		894982		evm.model.supercontig_157.65		GSVIVT01019471001		Bradi1g37840.1.p		LOC_Os04g52900.1	ABCG	evm_27.model.AmTr_v1.0_scaffold00003.186
	Potri.002G255800.1		Glyma.02G008000.1.p		872691		evm.model.supercontig_3.5		GSVIVT01019473001		Bradi1g37826.1.p		LOC_Os06g08560.1		evm_27.model.AmTr_v1.0_scaffold00013.47
	Potri.014G193400.1		Glyma.10G137600.1.p		872692		evm.model.supercontig_131.57		GSVIVT01019469001		Bradi1g37850.2.p	ABCD	LOC_Os01g73530.1		evm_27.model.AmTr_v1.0_scaffold00068.114
	Potri.008G179500.1		Glyma.03G224100.1.p	ABCD	337713		evm.model.supercontig_42.170		GSVIVT01019475001		Bradi2g12727.2.p		LOC_Os05g01700.1		evm_27.model.AmTr_v1.0_scaffold00122.57
	Potri.010G055200.1		Glyma.17G041200.1.p		490770		evm.model.supercontig_53.101		GSVIVT01019476001		Bradi5g03460.1.p		LOC_Os01g11946.1		evm_27.model.AmTr_v1.0_scaffold00122.54
	Potri.018G149600.1		Glyma.13G119000.1.p	ABCE	325255		evm.model.supercontig_5.257		GSVIVT01016879001		Bradi5g03477.1.p	ABCE	LOC_Os02g18180.1		evm_27.model.AmTr_v1.0_scaffold00122.55
	Potri.018G149700.1		Glyma.13G118800.1.p		921009		evm.model.supercontig_65.14		GSVIVT01016880001		Bradi1g47277.1.p	ABCF	LOC_Os11g39020.1		evm_27.model.AmTr_v1.0_scaffold00040.179
	Potri.014G180100.1		Glyma.13G118900.1.p		897608		evm.model.supercontig_222.15		GSVIVT01015960001		Bradi5g22077.1.p		LOC_Os03g32630.1		evm_27.model.AmTr_v1.0_scaffold00122.33
	Potri.003G135700.1	ABCC	Glyma.02G298400.1.p	ABCF	487818		evm.model.supercontig_12.135		GSVIVT01021589001	ABCD	Bradi2g39420.2.p		LOC_Os04g56330.1		evm_27.model.AmTr_v1.0_scaffold00069.197
	Potri.003G135800.1		Glyma.14G015300.1.p		496704		evm.model.supercontig_66.35		GSVIVT01021594001		Bradi2g61777.2.p		LOC_Os02g58020.1		evm_27.model.AmTr_v1.0_scaffold00069.201
	Potri.001G095600.1		Glyma.02G298500.1.p		906864		evm.model.supercontig_80.92		GSVIVT01021595001		Bradi2g07076.1.p		LOC_Os08g45010.1		evm_27.model.AmTr_v1.0_scaffold00029.420
	Potri.012G033600.1		Glyma.08G347000.1.p		332329		evm.model.supercontig_1.239		GSVIVT01027990001		Bradi2g54830.2.p		LOC_Os09g39910.1		evm_27.model.AmTr_v1.0_scaffold00088.14
	Potri.016G123000.1		Glyma.18G158400.1.p		474891		evm.model.supercontig_90.33	ABCD	GSVIVT01036685001	ABCE	Bradi3g10390.1.p	ABCG	LOC_Os12g22110.1		evm_27.model.AmTr_v1.0_scaffold00039.205
	Potri.012G033400.1		Glyma.08G326500.1.p		906863		evm.model.supercontig_42.28	ABCE	GSVIVT01036876001		Bradi3g33470.1.p		LOC_Os12g22284.1		evm_27.model.AmTr_v1.0_scaffold00039.206
	Potri.012G033500.1		Glyma.08G326600.1.p		350745		evm.model.supercontig_1.19	ABCF	GSVIVT01003144001		Bradi5g26535.1.p		LOC_Os12g22120.1		evm_27.model.AmTr_v1.0_scaffold00056.84
	Potri.015G023800.1		Glyma.18G263200.1.p		319015		evm.model.supercontig_1135.1		GSVIVT01019609001		Bradi4g16800.1.p		LOC_Os07g18874.1		evm_27.model.AmTr_v1.0_scaffold00009.36
	Potri.016G122800.1		Glyma.08G326200.1.p		333316		evm.model.supercontig_84.32		GSVIVT01001694001	ABCF	Bradi1g15780.1.p		LOC_Os09g07670.1		evm_27.model.AmTr_v1.0_scaffold00004.160
	Potri.002G205500.1		Glyma.18G079700.1.p		899360		evm.model.supercontig_1340.1		GSVIVT01034906001		Bradi2g42170.2.p		LOC_Os09g03939.1		evm_27.model.AmTr_v1.0_scaffold00030.92
	Potri.014G130500.1		Glyma.18G080900.1.p	ABCG	329987		evm.model.supercontig_84.30		GSVIVT01031505001		Bradi4g38960.1.p		LOC_Os10g08014.1		evm_27.model.AmTr_v1.0_scaffold01016.1
	Potri.003G034700.1		Glyma.13G127500.1.p		859266		evm.model.supercontig_65.118		GSVIVT01022235001		Bradi4g14020.1.p		LOC_Os09g29660.1		evm_27.model.AmTr_v1.0_scaffold00061.213
	Potri.003G034800.1		Glyma.03G167800.1.p		355259		evm.model.supercontig_112.27	ABCG	GSVIVT01002139001		Bradi3g56780.1.p		LOC_Os09g29670.1		evm_27.model.AmTr_v1.0_scaffold00134.17
	Potri.011G091200.1		Glyma.19G169000.1.p		485725		evm.model.supercontig_109.4		GSVIVT01002319001		Bradi3g12610.1.p		LOC_Os05g13520.1		evm_27.model.AmTr_v1.0_scaffold00057.269
	Potri.011G043100.1		Glyma.08G101500.1.p		481566		evm.model.supercontig_603.3		GSVIVT01002949001		Bradi4g38302.1.p		LOC_Os04g44610.1		evm_27.model.AmTr_v1.0_scaffold00011.184
	Potri.004G034700.1		Glyma.08G101700.1.p		484753		evm.model.supercontig_10.196		GSVIVT01015771001	ABCG	Bradi1g66110.1.p		LOC_Os10g35180.1		evm_27.model.AmTr_v1.0_scaffold00105.25
	Potri.004G034800.1		Glyma.05G145000.1.p		471753		evm.model.supercontig_23.164		GSVIVT01037566001		Bradi1g66120.1.p		LOC_Os09g07700.1		evm_27.model.AmTr_v1.0_scaffold00008.7
	Potri.003G182600.1		Glyma.03G101000.1.p		894406		evm.model.supercontig_19.11		GSVIVT01002136001		Bradi2g54300.1.p		LOC_Os10g08010.1		evm_27.model.AmTr_v1.0_scaffold00215.1
ABCD	Potri.010G176400.1		Glyma.07G121900.1.p		482613		evm.model.supercontig_19.9		GSVIVT01003413001		Bradi1g62810.1.p		LOC_Os01g42900.1		evm_27.model.AmTr_v1.0_scaffold00038.249
	Potri.005G076200.1		Glyma.10G227400.1.p		318409		evm.model.supercontig_5.60		GSVIVT01015767001		Bradi2g37630.1.p		LOC_Os06g30730.1		evm_27.model.AmTr_v1.0_scaffold00216.4
	Potri.007G092200.1		Glyma.20G165000.1.p		471713		evm.model.supercontig_19.8		GSVIVT01015768001		Bradi2g26560.1.p		LOC_Os05g31910.1		evm_27.model.AmTr_v1.0_scaffold00008.3
ABCE	Potri.004G235900.1		Glyma.10G227300.1.p		475320		evm.model.supercontig_146.34		GSVIVT01031516001		Bradi4g29810.2.p		LOC_Os09g23640.1		evm_27.model.AmTr_v1.0_scaffold04354.1
	Potri.003G045700.1		Glyma.16G172400.1.p		481901		evm.model.supercontig_48.214		GSVIVT01024228001		Bradi2g26800.1.p		LOC_Os05g02870.1		evm_27.model.AmTr_v1.0_scaffold02394.1
ABCF	Potri.010G254400.1		Glyma.16G172500.1.p		870083		evm.model.supercontig_19.7		GSVIVT01031528001		Bradi5g27650.1.p		LOC_Os05g02890.1		evm_27.model.AmTr_v1.0_scaffold00215.2
	Potri.001G087300.1		Glyma.16G172600.1.p		484044	ABCI	evm.model.supercontig_46.128		GSVIVT01031529001		Bradi1g40464.1.p		LOC_Os01g61940.1		evm_27.model.AmTr_v1.0_scaffold00008.2
	Potri.005G084800.1		Glyma.08G194700.1.p		479628		evm.model.supercontig_70.121		GSVIVT01022526001		Bradi2g43570.1.p		LOC_Os03g17350.1		evm_27.model.AmTr_v1.0_scaffold00010.397
	Potri.007G080600.1		Glyma.08G190700.1.p		892122		evm.model.supercontig_123.7		GSVIVT01001660001		Bradi4g24120.1.p		LOC_Os03g17370.1		evm_27.model.AmTr_v1.0_scaffold00216.5
ABCG	Potri.004G236500.1		Glyma.07G011600.1.p		474258		evm.model.supercontig_2.166		GSVIVT01014733001		Bradi3g16130.1.p		LOC_Os05g31080.1		evm_27.model.AmTr_v1.0_scaffold00072.60
	Potri.003G046800.1		Glyma.07G011500.1.p		471997		evm.model.supercontig_165.17		GSVIVT01034463001		Bradi1g36410.1.p		LOC_Os11g07600.1		evm_27.model.AmTr_v1.0_scaffold00171.9
	Potri.010G131900.1		Glyma.08G194600.1.p		481704		evm.model.supercontig_260.7		GSVIVT01014402001		Bradi1g74640.1.p		LOC_Os08g07010.1		evm_27.model.AmTr_v1.0_scaffold00107.1
	Potri.001G404000.1		Glyma.09G044500.1.p		892376		evm.model.supercontig_146.60		GSVIVT01011981001		Bradi3g29847.1.p		LOC_Os03g06139.1		evm_27.model.AmTr_v1.0_scaffold00075.44
	Potri.011G123200.1		Glyma.15G148500.1.p		482684		evm.model.supercontig_42.158		GSVIVT01036869001		Bradi5g16400.1.p		LOC_Os06g40550.1		evm_27.model.AmTr_v1.0_scaffold00031.113
	Potri.001G370600.1		Glyma.15G149900.1.p		332324		evm.model.supercontig_33.112		GSVIVT01011781001		Bradi2g31910.1.p		LOC_Os04g11820.1		evm_27.model.AmTr_v1.0_scaffold00021.52
	Potri.011G094700.1		Glyma.10G019000.1.p		473363		evm.TU.contig_32163.1		GSVIVT01028218001		Bradi1g00760.1.p		LOC_Os10g30610.1		evm_27.model.AmTr_v1.0_scaffold00063.58
	Potri.006G199500.1		Glyma.19G210700.1.p		904727		evm.TU.contig_38482.2		GSVIVT01016993001		Bradi4g32850.1.p		LOC_Os06g51460.1		evm_27.model.AmTr_v1.0_scaffold00046.166
	Potri.016G065900.1		Glyma.13G370300.1.p		476326		evm.TU.contig_40521.1		GSVIVT01035785001		Bradi4g08130.1.p		LOC_Os11g22350.1		evm_27.model.AmTr_v1.0_scaffold00060.152
	Potri.013G111900.1		Glyma.04G126500.1.p		328954		evm.model.supercontig_1.21		GSVIVT01014222001		Bradi3g57540.2.p		LOC_Os01g03144.1		evm_27.model.AmTr_v1.0_scaffold00007.144
	Potri.019G083000.1		Glyma.06G312300.1.p		318095		evm.model.supercontig_198.44		GSVIVT01020687001		Bradi5g02010.2.p		LOC_Os09g16458.1		evm_27.model.AmTr_v1.0_scaffold00263.1
	Potri.010G225200.1		Glyma.13G220000.1.p		485597		evm.model.supercontig_21.39		GSVIVT01022346001		Bradi5g02030.2.p		LOC_Os08g43120.1	ABCI	evm_27.model.AmTr_v1.0_scaffold00056.232
	Potri.006G126100.1		Glyma.15G092400.1.p		487463		evm.model.supercontig_30.12		GSVIVT01037274001		Bradi2g01610.1.p		LOC_Os02g32690.1		evm_27.model.AmTr_v1.0_scaffold00507.1
	Potri.001G058900.1	ABCD	Glyma.05G178900.1.p		357521		evm.model.supercontig_43.2		GSVIVT01028809001		Bradi1g31130.1.p		LOC_Os12g13720.1		evm_27.model.AmTr_v1.0_scaffold00077.146
	Potri.003G169000.1		Glyma.08G136400.1.p		913995		evm.model.supercontig_48.200		GSVIVT01003847001		Bradi4g45397.1.p		LOC_Os12g32820.1		evm_27.model.AmTr_v1.0_scaffold00009.361
	Potri.001G312200.1		Glyma.11G239800.1.p		474453		evm.model.supercontig_48.213		GSVIVT01006767001		Bradi1g38025.1.p		LOC_Os01g52560.1		evm_27.model.AmTr_v1.0_scaffold00012.174
	Potri.001G312300.1		Glyma.18G017600.1.p		480313		evm.model.supercontig_90.34		GSVIVT01008456001		Bradi2g48620.2.p		LOC_Os06g36090.1		evm_27.model.AmTr_v1.0_scaffold00003.199
	Potri.001G311500.1		Glyma.08G160900.1.p		488830		evm.model.supercontig_90.55		GSVIVT01032625001		Bradi2g43150.1.p		LOC_Os01g08260.1		evm_27.model.AmTr_v1.0_scaffold00067.59
	Potri.001G311300.1		Glyma.19G210800.1.p		485932		evm.model.supercontig_96.52		GSVIVT01025582001		Bradi2g10110.1.p		LOC_Os02g21340.1		evm_27.model.AmTr_v1.0_scaffold00019.354
	Potri.017G051300.1		Glyma.03G083800.1.p		906929		evm.TU.contig_35556.1		GSVIVT01025230001		Bradi3g07850.1.p		LOC_Os07g33780.1		evm_27.model.AmTr_v1.0_scaffold00049.19
	Potri.017G051000.1		Glyma.18G094000.1.p		485931		evm.TU.contig_32507.2		GSVIVT01025712001		Bradi1g26040.1.p		LOC_Os11g37700.1		evm_27.model.AmTr_v1.0_scaffold00028.33
	Potri.005G073100.1		Glyma.02G298300.1.p		482955		evm.model.supercontig_17.73		GSVIVT01016240001		Bradi1g00460.1.p		LOC_Os01g42350.1		evm_27.model.AmTr_v1.0_scaffold00120.61
	Potri.004G214000.1		Glyma.18G079600.1.p		906925		evm.TU.contig_41596.1		GSVIVT01024743001		Bradi2g04847.1.p		LOC_Os01g42370.1		evm_27.model.AmTr_v1.0_scaffold00003.6
	Potri.009G008200.1	ABCE	Glyma.07G035600.1.p		488177		evm.model.supercontig_9.224		GSVIVT01016994001		Bradi3g41987.2.p		LOC_Os01g42380.1		evm_27.model.AmTr_v1.0_scaffold00008.1
	Potri.017G155300.1		Glyma.11G090900.1.p		482729		evm.model.supercontig_12.185		GSVIVT01016998001		Bradi3g34890.1.p		LOC_Os08g29570.1		evm_27.model.AmTr_v1.0_scaffold00008.4
	Potri.018G152600.1	ABCF	Glyma.06G146900.1.p		485729		evm.TU.contig_38482.1		GSVIVT01016991001		Bradi4g28270.1.p		LOC_Os01g42410.1		evm_27.model.AmTr_v1.0_scaffold00009.411
	Potri.006G049000.1		Glyma.04G218900.1.p	ABCI	894577		evm.model.supercontig_1802.3		GSVIVT01016999001		Bradi1g35680.1.p		LOC_Os02g11760.1		evm_27.model.AmTr_v1.0_scaffold00012.139
	Potri.016G056600.1		Glyma.12G177500.1.p		488242		evm.TU.contig_44447.1		GSVIVT01017676001		Bradi2g43120.1.p		LOC_Os01g24010.1		evm_27.model.AmTr_v1.0_scaffold00016.34
	Potri.016G056700.1		Glyma.13G323200.1.p		893122		evm.model.supercontig_19.10		GSVIVT01031314001		Bradi5g02870.1.p		LOC_Os09g16330.2		evm_27.model.AmTr_v1.0_scaffold00016.374
	Potri.001G255800.1		Glyma.13G158600.1.p		893109				GSVIVT01031377001		Bradi3g27647.1.p		LOC_Os09g16380.1		evm_27.model.AmTr_v1.0_scaffold00024.18
	Potri.009G051200.1		Glyma.17G112700.1.p		893116				GSVIVT01031380001		Bradi3g55580.1.p		LOC_Os09g16449.1		evm_27.model.AmTr_v1.0_scaffold00030.74
	Potri.001G255900.1		Glyma.13G002500.1.p		478401				GSVIVT01031378001		Bradi1g29187.2.p		LOC_Os09g16290.1		evm_27.model.AmTr_v1.0_scaffold00047.178
	Potri.009G051300.1		Glyma.20G066600.1.p		475635				GSVIVT01036184001	ABCI	Bradi5g22580.1.p		LOC_Os03g64200.1		evm_27.model.AmTr_v1.0_scaffold00049.105
	Potri.001G393300.1		Glyma.11G194700.1.p		491344				GSVIVT01034745001		Bradi4g19047.3.p	ABCI	LOC_Os01g56400.1		evm_27.model.AmTr_v1.0_scaffold00067.70
	Potri.011G112100.1		Glyma.12G079400.1.p		311479				GSVIVT01034748001		Bradi4g38210.1.p		LOC_Os11g29850.1		evm_27.model.AmTr_v1.0_scaffold00069.199
	Potri.013G117700.1	ABCG	Glyma.03G175300.1.p		494585				GSVIVT01034741001		Bradi1g63380.1.p		LOC_Os03g46740.1		evm_27.model.AmTr_v1.0_scaffold00069.200
	Potri.005G064300.1		Glyma.19G176000.1.p		349529				GSVIVT01034746001		Bradi1g33777.1.p		LOC_Os06g48060.1		evm_27.model.AmTr_v1.0_scaffold00072.59
	Potri.007G104800.1		Glyma.20G242000.1.p		355242				GSVIVT01033804001		Bradi2g51200.1.p		LOC_Os03g21490.1		evm_27.model.AmTr_v1.0_scaffold00085.22
	Potri.015G027600.1		Glyma.01G020000.1.p		473442				GSVIVT01015456001		Bradi1g75570.1.p		LOC_Os04g53550.1		evm_27.model.AmTr_v1.0_scaffold00120.54
	Potri.009G070100.1		Glyma.09G202400.1.p		478309				GSVIVT01035715001		Bradi1g64110.1.p		LOC_Os04g31270.1		evm_27.model.AmTr_v1.0_scaffold00122.58
	Potri.012G045100.1		Glyma.05G247100.1.p		489574				GSVIVT01017188001		Bradi3g54870.1.p		LOC_Os02g56550.1		evm_27.model.AmTr_v1.0_scaffold00216.6
	Potri.015G036100.1		Glyma.08G055500.1.p		494555				GSVIVT01017198001		Bradi1g51940.2.p		LOC_Os03g20170.1		evm_27.model.AmTr_v1.0_scaffold00325.2
	Potri.007G004800.1		Glyma.10G229800.1.p		889048				GSVIVT01017197001		Bradi1g62900.1.p		LOC_Os01g03650.1		evm_27.model.AmTr_v1.0_scaffold00325.3
	Potri.002G156900.1		Glyma.20G163500.1.p		898445				GSVIVT01017201001		Bradi1g74916.1.p		LOC_Os01g61400.1		evm_27.model.AmTr_v1.0_scaffold00325.5
	Potri.014G080200.1		Glyma.04G211800.1.p		908201				GSVIVT01017202001		Bradi1g74922.1.p		LOC_Os01g74280.1		evm_27.model.AmTr_v1.0_scaffold00429.1
	Potri.006G215100.1		Glyma.06G154500.1.p		911736				GSVIVT01017187001		Bradi1g78746.1.p		LOC_Os02g41920.1		evm_27.model.AmTr_v1.0_scaffold01072.1
	Potri.008G047900.1		Glyma.05G192700.1.p		485698				GSVIVT01017196001		Bradi1g78752.1.p		LOC_Os03g05730.1		evm_27.model.AmTr_v1.0_scaffold01903.1
	Potri.010G213400.1		Glyma.08G000800.1.p		883909				GSVIVT01017184001		Bradi2g01870.1.p		LOC_Os05g04600.1		evm_27.model.AmTr_v1.0_scaffold02272.1
	Potri.010G115000.1		Glyma.07G231400.1.p						GSVIVT01017204001		Bradi2g53960.1.p		LOC_Os06g01980.1		evm_27.model.AmTr_v1.0_scaffold02407.1
	Potri.001G251100.1		Glyma.20G040400.1.p						GSVIVT01017185001		Bradi3g21310.2.p		LOC_Os08g31870.1		evm_27.model.AmTr_v1.0_scaffold03052.1
	Potri.001G189500.1		Glyma.12G228500.1.p						GSVIVT01017336001		Bradi3g27912.1.p		LOC_Os09g16330.1		evm_27.model.AmTr_v1.0_scaffold00069.198
	Potri.003G049600.1		Glyma.13G271300.1.p						GSVIVT01015461001		Bradi3g35771.1.p		LOC_Os10g06540.2		evm_27.model.AmTr_v1.0_scaffold00069.202
	Potri.008G099000.1		Glyma.02G188300.1.p						GSVIVT01017194001		Bradi3g43010.2.p		LOC_Os10g13830.1		evm_27.model.AmTr_v1.0_scaffold00067.85
	Potri.010G153800.1		Glyma.10G086800.1.p						GSVIVT01035780001		Bradi4g38187.1.p		LOC_Os10g30580.1
	Potri.008G098800.1		Glyma.03G204800.1.p						GSVIVT01035784001				LOC_Os11g27440.1
	Potri.015G006000.1		Glyma.19G202200.1.p						GSVIVT01035786001				LOC_Os12g32814.1
	Potri.002G188900.1		Glyma.02G302200.1.p					ABCI	GSVIVT01033294001				LOC_Os11g34350.1
	Potri.002G189100.1		Glyma.14G012000.1.p						GSVIVT01028360001
	Potri.010G153600.1		Glyma.08G332100.1.p						GSVIVT01031286001
	Potri.010G153700.1		Glyma.18G074800.1.p						GSVIVT01033060001
	Potri.003G178900.1		Glyma.10G217300.1.p						GSVIVT01026484001
	Potri.003G179000.1		Glyma.20G174800.1.p						GSVIVT01019131001
	Potri.001G048700.1		Glyma.01G091100.1.p						GSVIVT01026677001
	Potri.001G048800.1		Glyma.09G074700.1.p						GSVIVT01037976001
	Potri.001G049000.1		Glyma.02G130600.1.p						GSVIVT01003781001
	Potri.001G048900.1		Glyma.10G205600.1.p						GSVIVT01021593001
	Potri.006G248500.1		Glyma.20G184900.1.p						GSVIVT01029255001
	Potri.018G032900.1		Glyma.06G248800.1.p						GSVIVT01010362001
	Potri.001G175700.1		Glyma.13G279800.1.p						GSVIVT01016794001
	Potri.003G183200.1		Glyma.13G183400.1.p						GSVIVT01036588001
	Potri.018G074500.1		Glyma.16G076900.1.p						GSVIVT01002663001
	Potri.009G147100.1		Glyma.16G110100.1.p						GSVIVT01007689001
	Potri.006G115000.1		Glyma.01G154400.1.p						GSVIVT01010343001
	Potri.008G024400.1		Glyma.11G090200.1.p						GSVIVT01010853001
	Potri.003G057300.1		Glyma.11G196100.1.p						GSVIVT01012742001
	Potri.013G004900.1		Glyma.12G078000.1.p						GSVIVT01013180001
	Potri.003G197100.1		Glyma.10G057700.1.p						GSVIVT01015822001
	Potri.003G197200.1		Glyma.13G144500.1.p						GSVIVT01016992001
ABCI	Potri.004G214300.1		Glyma.02G163200.1.p						GSVIVT01017189001
	Potri.009G007800.1		Glyma.10G209200.1.p						GSVIVT01017190001
	Potri.008G003300.1		Glyma.20G181400.1.p						GSVIVT01017191001
	Potri.005G062800.1		Glyma.12G177200.1.p						GSVIVT01017193001
	Potri.002G212700.1		Glyma.20G052300.1.p						GSVIVT01017195001
	Potri.T149700.1		Glyma.13G323500.1.p						GSVIVT01017199001
	Potri.014G137000.1		Glyma.08G071100.1.p						GSVIVT01017200001
	Potri.002G036300.1		Glyma.13G043500.1.p						GSVIVT01017337001
	Potri.005G226600.1		Glyma.13G043600.1.p						GSVIVT01018890001
	Potri.006G086000.1		Glyma.08G071000.1.p						GSVIVT01021591001
	Potri.003G155800.1		Glyma.08G071200.1.p						GSVIVT01025723001
	Potri.018G110200.1		Glyma.13G043800.1.p						GSVIVT01028207001
	Potri.T044000.1		Glyma.13G043100.1.p						GSVIVT01028216001
	Potri.008G012500.1		Glyma.08G070900.1.p						GSVIVT01028457001
	Potri.018G132000.1		Glyma.13G043000.1.p						GSVIVT01029545001
	Potri.001G144500.1		Glyma.13G044000.1.p						GSVIVT01031381001
	Potri.001G417700.1		Glyma.08G070800.1.p						GSVIVT01031517001
	Potri.003G089700.1		Glyma.08G070700.1.p						GSVIVT01032557001
	Potri.003G182800.1		Glyma.13G042900.1.p						GSVIVT01036183001
	Potri.004G016900.1		Glyma.09G160000.1.p
	Potri.004G162000.1		Glyma.16G209400.1.p
	Potri.006G071900.1		Glyma.03G135300.1.p
	Potri.006G074200.1		Glyma.19G137700.1.p
	Potri.006G125500.1		Glyma.03G135200.1.p
	Potri.007G095900.1		Glyma.03G135400.1.p
	Potri.007G131700.1		Glyma.11G093800.1.p
	Potri.008G098900.1		Glyma.12G020300.1.p
	Potri.009G045600.1		Glyma.11G093900.1.p
	Potri.010G235800.1		Glyma.12G020400.1.p
	Potri.011G133500.1		Glyma.10G264900.1.p
	Potri.012G088200.1		Glyma.20G125600.1.p
	Potri.014G113400.1		Glyma.14G193300.1.p
	Potri.015G080600.1		Glyma.18G063400.1.p
	Potri.015G136700.1		Glyma.07G015800.1.p
	Potri.016G091600.1		Glyma.08G201300.1.p
	Potri.017G020100.1		Glyma.13G355000.1.p
	Potri.017G026100.1		Glyma.15G019200.1.p
	Potri.017G039100.1		Glyma.17G039300.1.p
	Potri.017G108200.1		Glyma.07G233900.1.p
	Potri.019G089600.1		Glyma.17G039200.1.p
	Potri.017G095400.1		Glyma.05G011900.1.p
	Potri.001G095700.1		Glyma.17G120100.1.p
			Glyma.13G361900.1.p
			Glyma.15G012000.1.p
			Glyma.15G011900.1.p
			Glyma.07G016200.1.p
			Glyma.07G033500.1.p
			Glyma.03G168100.1.p
			Glyma.03G168200.1.p
			Glyma.19G169200.1.p
			Glyma.03G168000.1.p
			Glyma.15G240400.1.p
			Glyma.19G169400.1.p
			Glyma.04G069800.1.p
			Glyma.06G071800.1.p
			Glyma.17G206100.1.p
			Glyma.14G127800.1.p
			Glyma.17G206300.1.p
			Glyma.13G362000.1.p
			Glyma.15G011800.1.p
			Glyma.10G203000.1.p
			Glyma.20G187400.1.p
			Glyma.02G159900.1.p
			Glyma.03G192700.1.p
			Glyma.03G192800.1.p
			Glyma.03G192500.1.p
			Glyma.19G192900.1.p
			Glyma.19G169300.1.p
			Glyma.03G192600.1.p
			Glyma.07G234000.1.p
		ABCI	Glyma.13G154800.1.p
			Glyma.10G145200.1.p
			Glyma.13G124700.1.p
			Glyma.05G221600.1.p
			Glyma.08G028100.1.p
			Glyma.05G081800.1.p
			Glyma.06G153500.1.p
			Glyma.09G251900.1.p
			Glyma.18G240700.1.p
			Glyma.19G094500.1.p
			Glyma.08G055000.1.p
			Glyma.01G199500.1.p
			Glyma.02G226400.1.p
			Glyma.02G275800.1.p
			Glyma.03G182800.1.p
			Glyma.04G145300.1.p
			Glyma.04G172400.1.p
			Glyma.04G186000.1.p
			Glyma.06G180000.1.p
			Glyma.06G189300.1.p
			Glyma.07G081000.1.p
			Glyma.08G326300.1.p
			Glyma.10G057100.1.p
			Glyma.11G042400.1.p
			Glyma.11G194900.1.p
			Glyma.12G177100.1.p
			Glyma.13G074600.1.p
			Glyma.13G143600.1.p
			Glyma.13G163700.1.p
			Glyma.13G323600.1.p
			Glyma.13G361800.1.p
			Glyma.14G040300.1.p
			Glyma.15G217000.1.p
			Glyma.15G241000.1.p
			Glyma.16G004800.1.p
			Glyma.17G107200.1.p
			Glyma.18G179000.1.p
			Glyma.19G183400.1.p
			Glyma.20G048400.1.p

## Sheet: S2
Supplementary Table 2 Fractionation of BraABC and their neighboring gene homeologs after triplication in B. rapa. Genes retained during fractionation are indicated as 1s. Genes lost during fractionation are indicated 0s. The three B. rapa subgenomes are indicated as LF, MF1 and MF2. "Retained" indicates the number of B. rapa genes retained relative to A. thaliana within the 21-gene syntenic windo…
LF
Collinear correlations	BrABC gene	Retained	10	9	8	7	6	5	4	3	2	1	0	1	2	3	4	5	6	7	8	9	10
AT3G60966	BraABCB21	4	0	0	0	0	1	0	0	0	0	0	0	1	0	0	0	0	1	0	1	0	0
AT3G28415	BraABCB18	11	0	0	0	0	0	1	1	1	1	0	1	1	0	0	1	1	1	1	1	0	0
AT4G18050	BraABCC4	10	1	0	1	0	0	0	1	1	1	1	0	0	0	0	0	1	0	1	1	0	1
AT3G13640	BraABCE2	10	1	1	1	0	1	0	0	1	1	0	0	1	1	0	0	0	0	0	0	1	1
AT3G13640	BraABCE3	10	1	1	1	0	1	0	0	1	1	0	0	1	1	0	0	0	0	0	0	1	1
AT2G37280	BraABCG23	13	1	0	1	0	1	0	1	0	1	1	1	1	0	1	1	0	0	1	1	1	0
AT1G15210	BraABCG54	17	0	1	1	1	1	1	0	0	1	1	1	1	1	1	1	0	1	1	1	1	1
AT5G13580	BraABCG60	17	1	0	1	1	1	1	0	1	1	1	1	1	1	1	1	0	1	1	0	1	1
AT4G04770	BraABCI25	15	0	1	0	0	0	1	1	0	1	1	1	1	1	1	1	1	1	1	1	1	0
AT4G14370	BraABCI2	2	0	0	0	0	0	0	0	0	0	0	1	0	0	0	0	0	0	0	0	1	0
AT2G41700	BraABCA2	13	0	0	1	1	1	0	0	1	1	0	0	1	1	1	1	1	1	0	1	0	1
AT2G47000	BraABCB13	16	1	1	1	1	1	1	1	1	0	0	1	1	1	1	1	1	0	1	0	0	1
AT2G47000	BraABCB12	16	1	1	1	1	1	1	1	1	0	0	1	1	1	1	1	1	0	1	0	0	1
AT3G62150	BraABCB23	12	1	0	0	0	0	1	1	0	1	0	0	1	0	1	1	1	0	1	1	1	1
AT4G25960	BraABCB8	14	0	1	1	1	0	1	1	0	1	1	1	1	1	1	1	0	1	0	0	0	1
AT1G10680	BraABCB15	11	1	1	1	0	1	1	0	1	1	0	1	1	1	0	0	0	1	0	0	0	0
AT2G36910	BraABCB11	12	0	1	0	1	1	0	1	1	0	1	0	0	0	1	0	1	1	1	1	1	0
AT2G36910	BraABCB5	12	0	1	0	1	1	0	1	1	0	1	0	0	0	1	0	1	1	1	1	1	0
AT3G28860	BraABCB17	13	1	1	1	1	1	1	0	1	1	1	1	0	0	0	0	0	1	1	0	1	0
AT3G28860	BraABCB28	13	1	1	1	1	1	1	0	1	1	1	1	0	0	0	0	0	1	1	0	1	0
AT4G25960	BraABCB2	14	0	1	1	1	0	1	1	0	1	1	1	1	1	1	1	0	1	0	0	0	1
AT1G28010	BraABCB29	15	1	1	1	1	0	1	1	1	0	0	1	1	0	0	0	1	1	1	1	1	1
AT2G39480	BraABCB6	13	0	0	0	1	0	1	1	1	1	1	1	1	1	1	1	0	0	1	1	0	0
AT2G39480	BraABCB14	13	0	0	0	1	0	1	1	1	1	1	1	1	1	1	1	0	0	1	1	0	0
AT3G55320	BraABCB9	11	1	0	1	1	1	1	1	1	1	0	0	1	0	0	0	0	1	1	0	0	0
AT1G70610	BraABCB22	13	1	0	1	0	1	1	0	1	1	0	0	0	1	1	1	0	1	1	1	1	0
AT4G25450	BraABCB24	10	0	0	0	0	1	1	0	1	1	1	0	0	1	0	1	1	0	1	1	0	0
AT5G39040	BraABCB10	8	1	0	0	0	0	0	0	1	1	1	1	0	0	0	1	1	0	0	0	0	1
AT5G03910	BraABCB38	13	0	0	1	1	0	0	1	1	1	1	1	0	1	0	1	1	1	1	0	0	1
AT5G58270	BraABCB4	11	0	0	0	0	0	0	1	1	1	0	1	0	1	0	0	1	1	1	1	1	1
AT5G58270	BraABCB36	11	0	0	0	0	0	0	1	1	1	0	1	0	1	0	0	1	1	1	1	1	1
AT2G34660	BraABCC5	12	1	0	0	1	1	0	1	1	1	0	1	0	0	0	1	1	1	0	0	1	1
AT3G21250	BraABCC7	15	1	0	1	1	1	1	0	0	0	1	1	1	1	0	1	1	1	1	1	1	0
AT3G21250	BraABCC1	15	1	0	1	1	1	1	0	0	0	1	1	1	1	0	1	1	1	1	1	1	0
AT3G59140	BraABCC16	11	1	1	0	1	0	1	0	0	1	1	1	0	1	0	1	0	1	1	0	0	0
AT3G62700	BraABCC17	15	1	1	1	0	1	0	1	1	1	0	1	1	1	0	0	1	1	1	1	0	1
AT3G60160	BraABCC11	13	1	1	1	1	0	1	0	1	1	1	0	0	1	1	0	1	1	0	0	1	0
AT1G04120	BraABCC18	11	1	0	0	0	0	1	1	1	1	1	1	0	0	0	0	1	0	1	0	1	1
AT4G39850	BraABCD2	14	1	1	1	1	1	1	0	1	0	1	0	1	1	1	0	1	1	0	0	0	1
AT4G19210	BraABCE1	14	0	1	1	1	1	1	1	1	0	1	1	0	1	0	0	0	0	1	1	1	1
AT4G19210	BraABCE4	14	0	1	1	1	1	1	1	1	0	1	1	0	1	0	0	0	0	1	1	1	1
AT4G19210	BraABCE6	14	0	1	1	1	1	1	1	1	0	1	1	0	1	0	0	0	0	1	1	1	1
AT5G64840	BraABCF2	13	0	1	1	0	0	1	1	1	0	1	0	1	0	1	1	1	1	0	0	1	1
AT3G54540	BraABCF4	12	1	1	1	1	0	0	0	0	1	0	1	1	1	1	0	1	0	0	1	0	1
AT1G64550	BraABCF5	0	0	0	0	0	0	0	0	0	0	0	0	0	0	0	0	0	0	0	0	0	0
AT5G60790	BraABCF3	10	1	1	1	1	1	0	0	0	1	1	0	1	0	0	0	1	0	0	0	1	0
AT3G54540	BraABCF6	12	1	1	1	1	0	0	0	0	1	0	1	1	1	1	0	1	0	0	1	0	1
AT5G09930	BraABCF7	12	1	1	0	0	1	1	0	1	0	1	1	0	0	1	1	0	0	0	1	1	1
AT3G53480	BraABCG46	17	1	1	1	1	1	1	1	1	1	0	0	1	1	1	1	1	1	0	0	1	1
AT3G30842	BraABCG43	3	0	0	0	0	1	0	0	0	0	1	1	0	0	0	0	0	0	0	0	0	0
AT2G26910	BraABCG19	5	0	1	0	0	0	0	0	0	1	0	0	0	1	1	0	0	0	0	1	0	0
AT1G15520	BraABCG41	15	1	1	1	1	0	0	1	1	1	1	1	0	1	1	1	0	0	1	1	1	0
AT2G36380	BraABCG22	10	0	1	1	0	1	0	1	0	1	0	0	1	1	0	1	1	0	0	0	0	1
AT2G36380	BraABCG9	10	0	1	1	0	1	0	1	0	1	0	0	1	1	0	1	1	0	0	0	0	1
AT3G16340	BraABCG3	19	1	1	1	1	1	1	1	1	1	1	1	1	1	1	1	0	0	1	1	1	1
AT3G16340	BraABCG35	19	1	1	1	1	1	1	1	1	1	1	1	1	1	1	1	0	0	1	1	1	1
AT2G29940	BraABCG10	8	0	0	0	0	0	1	1	1	0	0	0	0	1	1	1	0	0	0	1	1	0
AT2G29940	BraABCG21	8	0	0	0	0	0	1	1	1	0	0	0	0	1	1	1	0	0	0	1	1	0
AT2G37010	BraABCG29	13	0	1	0	1	1	1	1	1	0	0	1	0	0	1	1	1	1	0	0	1	1
AT1G53390	BraABCG31	9	0	0	0	0	0	0	0	0	0	1	0	1	1	1	0	1	0	1	1	1	1
AT1G31770	BraABCG55	10	0	0	1	0	0	0	1	0	0	1	1	0	1	0	0	1	1	1	1	1	0
AT1G31770	BraABCG33	10	0	0	1	0	0	0	1	0	0	1	1	0	1	0	0	1	1	1	1	1	0
AT3G25620	BraABCG7	12	0	0	0	0	0	1	1	0	1	1	1	1	0	0	0	1	1	1	1	1	1
AT3G25620	BraABCG44	11	0	0	0	0	0	1	1	0	1	1	1	1	0	0	0	1	1	1	1	1	0
AT4G27420	BraABCG13	18	1	1	1	1	1	1	0	0	1	0	1	1	1	1	1	1	1	1	1	1	1
AT4G27420	BraABCG2	18	1	1	1	1	1	1	0	0	1	0	1	1	1	1	1	1	1	1	1	1	1
AT1G71960	BraABCG50	18	1	1	1	1	1	1	1	1	1	1	1	1	1	1	1	1	1	0	1	0	0
AT1G71960	BraABCG49	18	1	1	1	1	1	1	1	1	1	1	1	1	1	1	1	1	1	0	1	0	0
AT1G71960	BraABCG6	18	1	1	1	1	1	1	1	1	1	1	1	1	1	1	1	1	1	0	1	0	0
AT3G52310	BraABCG18	9	1	0	0	0	0	0	1	0	0	1	0	0	1	0	0	1	0	1	1	1	1
AT5G06530	BraABCG4	15	1	1	0	1	1	1	0	1	1	0	1	1	1	1	1	1	1	1	0	0	0
AT5G06530	BraABCG61	15	1	1	0	1	1	1	0	1	1	0	1	1	1	1	1	1	1	1	0	0	0
AT3G13220	BraABCG63	7	1	1	1	0	0	1	0	1	1	0	0	0	0	0	0	0	0	0	1	0	0
AT5G19410	BraABCG59	14	0	1	1	1	1	1	0	0	1	1	1	1	0	1	1	1	0	1	1	0	0
AT2G01320	BraABCG52	8	1	0	1	0	0	1	0	1	1	0	0	0	1	0	0	0	1	0	0	0	1
AT2G13610	BraABCG11	0	0	0	0	0	0	0	0	0	0	0	0	0	0	0	0	0	0	0	0	0	0
AT1G53270	BraABCG51	7	1	0	1	1	1	0	1	1	0	0	0	1	0	0	0	0	0	0	0	0	0
AT4G25750	BraABCG1	13	0	0	0	1	1	0	0	1	0	1	1	1	1	1	1	1	1	1	0	0	1
AT5G52860	BraABCG5	13	0	1	0	1	0	0	1	0	1	1	0	1	1	1	1	1	0	1	1	0	1
AT2G28070	BraABCG45	15	1	1	0	1	0	1	1	0	1	1	1	0	1	1	0	0	1	1	1	1	1
AT2G28070	BraABCG20	15	1	1	0	1	0	1	1	0	1	1	1	0	1	1	0	0	1	1	1	1	1
AT1G17840	BraABCG53	15	0	1	0	1	0	1	0	1	1	1	1	1	1	1	1	1	0	1	1	1	0
AT1G17840	BraABCG42	15	0	1	0	1	0	1	0	1	1	1	1	1	1	1	1	1	0	1	1	1	0
AT1G51460	BraABCG38	8	0	1	1	0	1	0	0	0	1	1	1	0	0	0	1	0	1	0	0	0	0
AT1G51500	BraABCG32	8	1	0	1	0	0	1	1	1	0	0	0	1	0	1	0	0	0	0	0	1	0
AT3G53510	BraABCG56	16	0	0	1	1	1	1	1	1	1	1	1	1	0	0	1	1	1	1	1	1	0
AT2G37360	BraABCG24	14	1	0	1	1	1	1	0	1	1	0	0	1	1	1	0	1	0	1	0	1	1
AT1G67940	BraABCI19	11	0	0	1	0	0	0	0	0	1	1	1	1	0	1	1	1	1	0	1	1	0
AT1G65410	BraABCI5	4	0	0	0	0	0	0	0	0	0	0	0	0	0	1	1	0	1	1	0	0	0
AT5G14100	BraABCI28	14	1	0	1	1	1	1	0	1	1	1	1	1	1	1	1	0	0	0	0	1	0
AT1G63270	BraABCI22	0	0	0	0	0	0	0	0	0	0	0	0	0	0	0	0	0	0	0	0	0	0
AT3G10660	BraABCI15	11	1	1	1	0	0	0	1	0	0	0	1	0	1	0	1	0	1	0	1	1	1
AT3G10660	BraABCI11	11	1	1	1	0	0	0	1	0	0	0	1	0	1	0	1	0	1	0	1	1	1
AT4G33460	BraABCI1	17	0	0	0	1	1	1	1	1	1	1	1	0	1	1	1	1	1	1	1	1	1
AT1G03905	BraABCI21	15	1	1	1	0	1	1	1	1	1	1	0	1	1	0	0	1	0	1	0	1	1
AT5G44110	BraABCI24	13	1	1	1	0	1	0	1	1	0	0	0	1	1	0	0	1	0	1	1	1	1
AT5G02270	BraABCI8	17	1	1	0	1	0	1	1	1	1	1	1	1	1	1	1	0	1	1	1	1	0
AT5G02270	BraABCI29	17	1	1	0	1	0	1	1	1	1	1	1	1	1	1	1	0	1	1	1	1	0
AT3G09840	BraABCI10	16	1	0	1	1	1	0	1	1	0	1	1	1	1	0	1	1	1	1	1	0	1
AT3G53230	BraABCI18	12	1	1	0	1	0	1	1	1	0	0	1	0	0	1	1	1	1	1	0	0	0
AT5G03340	BraABCI9	11	1	1	0	1	1	1	1	1	1	1	0	0	0	0	0	1	0	0	0	0	1
AT3G53230	BraABCI26	12	1	1	0	1	0	1	1	1	0	0	1	0	0	1	1	1	1	1	0	0	0
AT1G32500	BraABCI17	10	1	1	0	1	0	1	1	1	0	0	0	0	1	1	0	1	1	0	0	0	0
AT1G15520	BraABCI27	15	1	1	1	1	0	0	1	1	1	1	1	0	1	1	1	0	0	1	1	1	0
AT3G09840	BraABCI16	16	1	0	1	1	1	0	1	1	0	1	1	1	1	0	1	1	1	1	1	0	1
AT3G28860	BraABCI7	13	1	1	1	1	1	1	0	1	1	1	1	0	0	0	0	0	1	1	0	1	0
AT1G67120	BraABCI6	7	1	1	1	0	0	0	0	0	0	0	0	0	1	0	0	0	1	0	1	1	0
AT3G09840	BraABCI4	16	1	0	1	1	1	0	1	1	0	1	1	1	1	0	1	1	1	1	1	0	1
AT3G20320	BraABCI14	16	1	1	1	1	1	1	1	1	1	1	1	0	1	1	0	0	1	1	1	0	0
tandem array(bpa)_tandem array(ath)	BraABCA4	16	1	0	1	1	1	1	1	0	0	1	1	1	1	1	0	1	1	1	0	1	1
tandem array(bpa)_tandem array(ath)	BraABCA9	13	1	0	1	1	0	1	0	1	1	1	1	0	1	1	1	0	0	1	0	1	0
tandem array(bpa)_tandem array(ath)	BraABCA3	15	1	0	1	1	1	1	1	0	0	1	1	0	1	1	1	0	1	1	1	0	1
tandem array(bpa)_tandem array(ath)	BraABCA6	13	1	0	1	1	0	1	0	1	1	1	1	0	1	1	1	0	0	1	0	1	0
tandem array(bpa)_tandem array(ath)	BraABCA1	14	1	1	0	1	1	1	0	1	1	1	1	0	1	1	1	0	0	1	0	1	0
tandem array(bpa)_tandem array(ath)	BraABCA8	13	1	0	1	1	0	1	0	1	1	1	1	0	1	1	1	0	0	1	0	1	0
tandem array(bpa)_tandem array(ath)	BraABCA7	13	1	0	1	1	0	1	0	1	1	1	1	0	1	1	1	0	0	1	0	1	0
tandem array(bpa)_tandem array(ath)	BraABCB20	11	0	0	0	0	0	0	0	1	1	1	1	0	1	1	0	0	1	1	1	1	1
tandem array(bpa)_tandem array(ath)	BraABCB19	11	0	0	0	0	0	0	0	1	1	1	1	0	1	1	0	0	1	1	1	1	1
tandem array(bpa)_tandem array(ath)	BraABCC15	14	1	1	1	1	1	0	0	1	1	1	1	1	0	0	0	1	0	0	1	1	1
tandem array(bpa)_tandem array(ath)	BraABCC14	14	1	1	1	1	1	0	0	1	1	1	1	1	0	0	0	1	0	0	1	1	1
tandem array(bpa)_tandem array(ath)	BraABCC2	13	0	0	1	1	0	0	1	0	1	1	1	1	1	1	1	0	0	1	0	1	1
tandem array(bpa)_tandem array(ath)	BraABCC3	13	0	0	1	1	0	0	1	0	1	1	1	1	1	1	1	0	0	1	0	1	1
tandem array(bpa)_tandem array(ath)	BraABCC20	13	0	0	1	1	0	0	1	0	1	1	1	1	1	1	1	0	0	1	0	1	1
tandem array(bpa)_tandem array(ath)	BraABCC21	13	0	0	1	1	0	0	1	0	1	1	1	1	1	1	1	0	0	1	0	1	1
tandem array(bpa)_tandem array(ath)	BraABCG12	9	0	0	1	1	1	0	0	1	1	0	0	1	1	0	1	0	0	0	0	0	1
tandem array(bpa)_tandem array(ath)	BraABCG14	14	1	0	0	0	1	0	0	1	0	1	1	1	1	0	1	1	1	1	1	1	1
tandem array(bpa)_tandem array(ath)	BraABCG15	14	1	0	0	0	1	0	0	1	0	1	1	1	1	0	1	1	1	1	1	1	1
tandem array(bpa)_tandem array(ath)	BraABCG16	14	1	0	0	0	1	0	0	1	0	1	1	1	1	0	1	1	1	1	1	1	1
tandem array(bpa)_tandem array(ath)	BraABCG17	13	1	0	0	0	1	0	0	1	0	1	0	1	1	0	1	1	1	1	1	1	1
tandem array(bpa)_tandem array(ath)	BraABCI20	18	1	1	0	1	1	0	1	1	1	1	1	1	0	1	1	1	1	1	1	1	1
tandem array(bpa)_tandem array(ath)	BraABCI3	13	1	0	1	1	0	1	0	1	1	1	1	0	1	1	1	0	0	1	0	1	0
single copy(bpa)_tandem array(ath)	BraABCA5	16	1	1	1	1	0	0	1	1	0	1	1	1	0	1	1	1	0	1	1	1	1
single copy(bpa)_tandem array(ath)	BraABCB25	10	0	1	0	0	0	1	1	0	0	0	1	0	0	1	1	1	0	1	0	1	1
single copy(bpa)_tandem array(ath)	BraABCB35	11	0	1	1	0	0	1	1	0	0	0	1	0	0	1	1	1	0	1	0	1	1
single copy(bpa)_tandem array(ath)	BraABCB3	9	0	0	0	0	0	0	0	0	0	1	1	1	1	0	1	1	0	0	1	1	1
single copy(bpa)_tandem array(ath)	BraABCB1	14	1	0	0	1	0	0	0	0	1	1	1	1	1	1	1	1	1	1	0	1	1
single copy(bpa)_tandem array(ath)	BraABCC12	14	1	1	1	1	1	0	0	1	1	1	1	1	0	0	0	1	0	0	1	1	1
single copy(bpa)_tandem array(ath)	BraABCC10	14	1	1	1	1	1	0	0	1	1	1	1	1	0	0	0	1	0	0	1	1	1
single copy(bpa)_tandem array(ath)	BraABCC8	13	0	0	1	1	0	0	1	0	1	1	1	1	1	1	1	0	0	1	0	1	1
single copy(bpa)_tandem array(ath)	BraABCG34	14	1	0	0	1	0	0	1	1	0	1	1	1	0	1	1	1	1	0	1	1	1
single copy(bpa)_tandem array(ath)	BraABCG47	14	1	0	0	0	1	0	0	1	0	1	1	1	1	0	1	1	1	1	1	1	1
single copy(bpa)_tandem array(ath)	BraABCG57	14	1	0	0	0	1	0	0	1	0	1	1	1	1	0	1	1	1	1	1	1	1
single copy(bpa)_tandem array(ath)	BraABCA10	13	1	0	1	1	0	1	0	1	1	1	1	0	1	1	1	0	0	1	0	1	0
tandem array(bpa)_single copy(AT5G46540)	BraABCB34	11	1	1	0	1	0	0	0	0	0	0	0	0	1	1	1	1	1	1	1	0	1
tandem array(bpa)_single copy(AT5G46540)	BraABCB33	11	1	1	0	1	0	0	0	0	0	0	0	0	1	1	1	1	1	1	1	0	1
tandem array(bpa)_single copy(AT1G27940)	BraABCB30	12	1	1	0	0	0	0	0	1	1	1	1	1	0	1	1	1	0	0	1	1	0
tandem array(bpa)_single copy(AT1G27940)	BraABCB31	12	1	1	0	0	0	0	0	1	1	1	1	1	0	1	1	1	0	0	1	1	0
tandem array(bpa)_single copy(AT3G28415)	BraABCB27	12	0	0	0	0	0	1	1	1	1	0	1	1	0	0	1	1	1	1	1	1	0
tandem array(bpa)_single copy(AT3G28415)	BraABCB26	12	0	0	0	0	0	1	1	1	1	0	1	1	0	0	1	1	1	1	1	1	0
tandem array(bpa)_single copy(AT1G27680)	BraABCE7	10	0	1	1	0	1	0	0	0	0	1	1	0	0	0	1	0	1	1	1	0	1
tandem array(bpa)_single copy(AT2G37280)	BraABCG28	13	1	0	1	0	1	0	1	0	1	1	1	1	0	1	1	0	0	1	1	1	0
tandem array(bpa)_single copy(AT1G27680)	BraABCG27	13	1	0	1	0	1	0	1	0	1	1	1	1	0	1	1	0	0	1	1	1	0
tandem array(bpa)_single copy(AT1G15210)	BraABCG39	17	0	1	1	1	1	1	0	0	1	1	1	1	1	1	1	0	1	1	1	1	1
tandem array(bpa)_single copy(AT1G15210)	BraABCG40	16	0	1	1	1	1	1	0	0	0	1	1	1	1	1	1	0	1	1	1	1	1
tandem array(bpa)_single copy(AT1G53400)	BraABCG37	9	0	0	0	0	0	0	0	0	1	0	1	1	1	0	1	0	1	1	1	1	0
tandem array(bpa)_single copy(AT1G53400)	BraABCG36	8	0	0	0	0	0	0	0	0	1	0	1	1	1	0	1	0	1	0	1	1	0
tandem array(bpa)_single copy(AT2G39350)	BraABCG25	10	0	0	0	1	0	0	1	1	0	1	1	0	1	1	0	0	0	1	0	1	1
tandem array(bpa)_single copy(AT2G39350)	BraABCG26	10	0	0	0	1	0	0	1	1	0	1	1	0	1	1	0	0	0	1	0	1	1
tandem array(bpa)_single copy(AT2G39350)	BraABCI13	10	0	0	0	1	0	0	1	1	0	1	1	0	1	1	0	0	0	1	0	1	1
single copy(bpa)_loss(ath)	BraABCA11	8	0	1	0	1	0	1	0	1	0	1	1	0	0	0	0	0	0	0	1	1	0
single copy(bpa)_loss(ath)	BraABCB37	12	1	0	0	1	1	0	0	1	1	1	1	1	0	1	1	1	1	0	0	0	0
single copy(bpa)_loss(ath)	BraABCB7	9	0	1	0	0	0	1	1	1	1	0	0	0	0	0	0	1	0	1	1	0	1
single copy(bpa)_loss(ath)	BraABCB16	12	1	0	1	1	1	0	1	0	0	1	1	1	0	1	1	0	0	0	1	0	1
single copy(bpa)_loss(ath)	BraABCB32	9	1	0	0	1	0	1	1	1	0	0	0	1	1	0	1	0	0	1	0	0	0
single copy(bpa)_loss(ath)	BraABCC9	7	0	0	0	1	0	1	0	1	1	1	1	0	0	0	0	1	0	0	0	0	0
single copy(bpa)_loss(ath)	BraABCC6	7	0	1	0	1	0	1	1	1	0	0	0	0	0	1	0	0	0	0	0	1	0
single copy(bpa)_loss(ath)	BraABCC13	13	0	1	1	1	1	1	1	1	1	0	0	0	0	1	0	1	1	0	1	1	0
single copy(bpa)_loss(ath)	BraABCC19	13	1	1	1	0	1	0	0	0	1	1	0	1	1	1	1	0	1	1	1	0	0
single copy(bpa)_loss(ath)	BraABCD1	14	1	0	1	0	0	0	1	1	0	1	1	1	1	1	1	1	0	0	1	1	1
single copy(bpa)_loss(ath)	BraABCE5	12	1	1	0	1	0	1	1	0	1	0	0	1	0	1	0	0	1	1	0	1	1
single copy(bpa)_loss(ath)	BraABCF1	14	1	0	1	0	1	1	0	1	0	1	0	1	1	1	0	0	1	1	1	1	1
single copy(bpa)_loss(ath)	BraABCG30	4	1	1	0	0	0	0	0	0	0	0	0	0	0	0	0	0	1	0	0	0	1
single copy(bpa)_loss(ath)	BraABCG48	6	0	1	1	1	1	1	1	0	0	0	0	0	0	0	0	0	0	0	0	0	0
single copy(bpa)_loss(ath)	BraABCG8	18	0	1	1	1	0	1	1	1	1	1	0	1	1	1	1	1	1	1	1	1	1
single copy(bpa)_loss(ath)	BraABCG62	6	0	0	0	0	0	1	0	0	0	1	1	1	0	1	1	0	0	0	0	0	0
single copy(bpa)_loss(ath)	BraABCG58	11	0	0	1	1	0	1	1	0	1	0	1	1	0	0	0	1	0	1	0	1	1
single copy(bpa)_loss(ath)	BraABCI12	9	1	1	1	0	0	0	0	0	0	0	1	1	1	0	1	0	0	1	1	0	0
single copy(bpa)_loss(ath)	BraABCI23	3	0	0	0	0	0	0	0	0	0	0	0	0	0	0	0	1	1	1	0	0	0
MF1
Collinear correlations	BrABC gene	Retained	10	9	8	7	6	5	4	3	2	1	0	1	2	3	4	5	6	7	8	9	10
AT3G60966	BraABCB21	6	0	1	1	1	0	0	0	0	0	0	0	1	0	0	0	0	1	0	0	0	1
AT3G28415	BraABCB18	8	0	0	0	0	1	0	1	0	1	0	0	1	0	0	1	1	0	1	0	1	0
AT4G18050	BraABCC4	9	0	1	1	0	0	0	1	1	0	1	1	1	1	0	0	1	0	0	0	0	0
AT3G13640	BraABCE2	9	0	0	1	0	0	0	1	1	0	1	1	1	1	0	0	0	0	1	0	1	0
AT3G13640	BraABCE3	9	0	0	1	0	0	0	1	1	0	1	1	1	1	0	0	0	0	1	0	1	0
AT2G37280	BraABCG23	15	1	0	1	1	1	0	1	1	0	1	1	0	1	1	1	0	1	1	0	1	1
AT1G15210	BraABCG54	8	0	1	0	0	1	1	0	0	1	0	1	0	1	0	0	0	0	1	1	0	0
AT5G13580	BraABCG60	7	0	1	1	1	0	0	1	1	0	0	0	0	0	0	0	1	0	0	1	0	0
AT4G04770	BraABCI25	6	0	1	0	1	0	0	0	0	1	1	0	0	0	1	0	0	0	0	0	1	0
AT4G14370	BraABCI2	3	0	0	0	0	0	0	0	0	0	0	0	0	0	0	0	0	0	1	1	0	1
AT2G41700	BraABCA2	4	1	0	1	0	0	0	1	0	0	0	0	1	0	0	0	0	0	0	0	0	0
AT2G47000	BraABCB13	5	1	0	0	0	0	0	0	0	1	0	1	0	0	1	1	0	0	0	0	0	0
AT2G47000	BraABCB12	5	1	0	0	0	0	0	0	0	1	0	1	0	0	1	1	0	0	0	0	0	0
AT3G62150	BraABCB23	7	1	0	0	1	1	0	0	1	1	0	0	0	0	0	0	1	0	0	0	0	1
AT4G25960	BraABCB8	9	0	0	1	1	0	0	0	0	0	1	1	0	0	1	1	0	1	1	0	0	1
AT1G10680	BraABCB15	6	0	0	1	0	1	1	0	0	1	1	0	0	0	0	0	0	0	1	0	0	0
AT2G36910	BraABCB11	9	1	0	0	1	1	0	0	1	1	0	1	0	0	0	0	1	1	0	0	0	1
AT2G36910	BraABCB5	9	1	0	0	1	1	0	0	1	1	0	1	0	0	0	0	1	1	0	0	0	1
AT3G28860	BraABCB17	11	1	0	1	1	0	0	1	1	1	1	1	0	1	0	0	1	1	0	0	0	0
AT3G28860	BraABCB28	11	1	0	1	1	0	0	1	1	1	1	1	0	1	0	0	1	1	0	0	0	0
AT4G25960	BraABCB2	9	0	0	1	1	0	0	0	0	0	1	1	0	0	1	1	0	1	1	0	0	1
AT1G28010	BraABCB29	9	0	0	0	1	1	1	1	0	0	0	0	0	0	0	1	1	1	1	0	0	1
AT2G39480	BraABCB6	10	0	1	0	1	0	0	1	1	1	0	0	0	0	1	1	0	0	0	1	1	1
AT2G39480	BraABCB14	10	0	1	0	1	0	0	1	1	1	0	0	0	0	1	1	0	0	0	1	1	1
AT3G55320	BraABCB9	14	1	0	1	0	1	1	0	0	1	1	1	1	1	1	1	0	1	1	1	0	0
AT1G70610	BraABCB22	14	1	1	1	1	1	1	1	0	0	1	0	1	0	0	0	1	1	1	1	0	1
AT4G25450	BraABCB24	13	1	1	0	1	1	1	0	0	0	0	0	1	1	0	1	0	1	1	1	1	1
AT5G39040	BraABCB10	4	0	0	0	0	0	0	0	0	1	0	0	0	0	0	1	0	0	0	1	1	0
AT5G03910	BraABCB38	5	0	0	1	1	0	1	1	1	0	0	0	0	0	0	0	0	0	0	0	0	0
AT5G58270	BraABCB4	10	0	0	1	0	1	0	0	0	1	1	1	0	1	1	0	1	1	0	1	0	0
AT5G58270	BraABCB36	10	0	0	1	0	1	0	0	0	1	1	1	0	1	1	0	1	1	0	1	0	0
AT2G34660	BraABCC5	6	0	1	0	1	1	0	0	0	1	0	0	0	0	0	0	1	0	0	0	1	0
AT3G21250	BraABCC7	10	0	0	1	1	1	1	0	1	1	0	1	1	1	0	0	0	0	0	1	0	0
AT3G21250	BraABCC1	10	0	0	1	1	1	1	0	1	1	0	1	1	1	0	0	0	0	0	1	0	0
AT3G59140	BraABCC16	5	1	1	1	0	0	1	0	0	1	0	0	0	0	0	0	0	0	0	0	0	0
AT3G62700	BraABCC17	9	1	0	0	1	1	1	1	0	1	1	0	0	1	0	0	0	0	0	0	0	1
AT3G60160	BraABCC11	13	1	1	0	1	1	0	0	1	1	0	0	1	1	1	1	1	0	1	0	1	0
AT1G04120	BraABCC18	6	0	0	0	1	0	0	1	0	0	0	0	0	1	0	0	1	0	0	1	1	0
AT4G39850	BraABCD2	1	0	1	0	0	0	0	0	0	0	0	0	0	0	0	0	0	0	0	0	0	0
AT4G19210	BraABCE1	6	0	1	0	0	0	1	0	0	0	0	1	1	1	0	0	0	0	0	0	1	0
AT4G19210	BraABCE4	6	0	1	0	0	0	1	0	0	0	0	1	1	1	0	0	0	0	0	0	1	0
AT4G19210	BraABCE6	6	0	1	0	0	0	1	0	0	0	0	1	1	1	0	0	0	0	0	0	1	0
AT5G64840	BraABCF2	9	0	1	0	1	0	1	0	0	1	0	1	1	0	1	0	1	1	0	0	0	0
AT3G54540	BraABCF4	9	0	0	0	1	0	0	0	0	1	0	1	0	0	0	1	1	1	1	0	1	1
AT1G64550	BraABCF5	6	0	0	1	0	1	0	0	1	1	0	1	0	0	0	0	0	0	0	0	0	1
AT5G60790	BraABCF3	7	0	0	0	0	1	0	0	0	0	0	1	1	1	0	0	1	1	0	1	0	0
AT3G54540	BraABCF6	9	0	0	0	1	0	0	0	0	1	0	1	0	0	0	1	1	1	1	0	1	1
AT5G09930	BraABCF7	7	0	1	0	1	1	0	0	1	0	1	0	1	0	0	0	0	0	1	0	0	0
AT3G53480	BraABCG46	8	0	0	0	1	1	0	1	0	0	1	0	0	0	1	0	1	0	0	0	1	1
AT3G30842	BraABCG43	2	0	0	0	0	1	0	0	0	0	1	0	0	0	0	0	0	0	0	0	0	0
AT2G26910	BraABCG19	4	0	0	0	0	0	0	1	0	0	0	1	0	0	0	0	0	0	1	0	0	1
AT1G15520	BraABCG41	6	1	1	1	1	0	0	0	0	1	0	0	0	0	0	1	0	0	0	0	0	0
AT2G36380	BraABCG22	9	0	0	0	0	0	1	0	0	0	1	1	0	1	1	1	1	0	1	1	0	0
AT2G36380	BraABCG9	10	0	1	0	0	0	1	0	0	0	1	1	0	1	1	1	1	0	1	1	0	0
AT3G16340	BraABCG3	6	1	1	0	0	0	0	0	0	0	0	1	0	0	0	0	0	0	1	0	1	1
AT3G16340	BraABCG35	6	1	1	0	0	0	0	0	0	0	0	1	0	0	0	0	0	0	1	0	1	1
AT2G29940	BraABCG10	6	0	0	0	0	0	0	0	0	0	0	1	0	1	0	1	0	1	1	1	0	0
AT2G29940	BraABCG21	6	0	0	0	0	0	0	0	0	0	0	1	0	1	0	1	0	1	1	1	0	0
AT2G37010	BraABCG29	7	0	0	0	1	1	0	0	0	1	0	0	0	0	1	0	1	0	1	1	0	0
AT1G53390	BraABCG31	9	1	1	0	1	0	1	0	1	0	1	0	0	0	0	1	1	0	0	1	0	0
AT1G31770	BraABCG55	6	0	0	1	0	1	1	0	0	0	0	0	0	0	0	1	1	1	0	0	0	0
AT1G31770	BraABCG33	6	0	0	1	0	1	1	0	0	0	0	0	0	0	0	1	1	1	0	0	0	0
AT3G25620	BraABCG7	10	0	0	0	0	0	1	1	1	0	1	1	1	0	0	1	0	0	0	1	1	1
AT3G25620	BraABCG44	9	0	0	0	0	0	1	1	1	0	1	1	1	0	0	1	0	0	0	1	1	0
AT4G27420	BraABCG13	11	1	0	0	0	0	0	1	1	1	0	1	0	1	1	0	0	1	1	1	1	0
AT4G27420	BraABCG2	11	1	0	0	0	0	0	1	1	1	0	1	0	1	1	0	0	1	1	1	1	0
AT1G71960	BraABCG50	14	0	0	1	1	1	0	1	1	1	1	1	1	0	0	0	1	1	0	1	1	1
AT1G71960	BraABCG49	14	0	0	1	1	1	0	1	1	1	1	1	1	0	0	0	1	1	0	1	1	1
AT1G71960	BraABCG6	14	0	0	1	1	1	0	1	1	1	1	1	1	0	0	0	1	1	0	1	1	1
AT3G52310	BraABCG18	11	1	0	1	1	1	1	1	0	0	0	1	0	1	1	0	0	0	0	1	0	1
AT5G06530	BraABCG4	6	0	1	1	0	1	0	0	0	0	0	0	0	0	0	1	0	0	1	1	0	0
AT5G06530	BraABCG61	6	0	1	1	0	1	0	0	0	0	0	0	0	0	0	1	0	0	1	1	0	0
AT3G13220	BraABCG63	13	1	0	1	1	1	1	1	0	1	0	1	1	1	0	1	1	0	0	0	1	0
AT5G19410	BraABCG59	7	0	0	1	1	1	0	1	0	0	0	0	1	1	0	0	0	1	0	0	0	0
AT2G01320	BraABCG52	13	0	1	1	1	1	1	0	1	1	0	1	0	1	1	0	0	0	1	0	1	1
AT2G13610	BraABCG11	5	0	0	0	1	0	0	0	1	1	0	0	1	0	0	0	0	0	1	0	0	0
AT1G53270	BraABCG51	13	1	1	0	0	1	1	1	1	0	0	1	1	0	0	1	1	1	0	1	0	1
AT4G25750	BraABCG1	7	0	0	0	0	1	0	0	0	1	1	0	1	0	0	0	1	0	1	1	0	0
AT5G52860	BraABCG5	8	0	1	0	0	0	0	0	0	1	0	0	1	0	1	1	1	0	0	1	0	1
AT2G28070	BraABCG45	9	0	0	1	1	0	1	1	0	0	0	1	1	0	0	1	0	1	1	0	0	0
AT2G28070	BraABCG20	9	0	0	1	1	0	1	1	0	0	0	1	1	0	0	1	0	1	1	0	0	0
AT1G17840	BraABCG53	11	1	0	1	0	1	1	0	0	0	1	1	0	1	0	1	0	0	1	1	0	1
AT1G17840	BraABCG42	11	1	0	1	0	1	1	0	0	0	1	1	0	1	0	1	0	0	1	1	0	1
AT1G51460	BraABCG38	7	1	0	0	0	1	1	1	0	0	0	0	1	0	0	1	0	1	0	0	0	0
AT1G51500	BraABCG32	9	0	0	1	1	1	0	0	0	1	0	0	1	0	1	0	0	0	0	1	1	1
AT3G53510	BraABCG56	9	1	1	1	0	0	0	1	1	0	1	0	0	1	0	0	0	1	0	1	0	0
AT2G37360	BraABCG24	14	0	1	0	1	1	0	1	1	1	0	1	1	0	1	1	0	1	1	0	1	1
AT1G67940	BraABCI19	6	0	0	1	0	0	0	0	0	1	0	0	0	0	1	1	1	0	0	0	1	0
AT1G65410	BraABCI5	7	0	0	0	0	0	0	0	0	1	0	1	1	1	1	0	1	0	1	0	0	0
AT5G14100	BraABCI28	11	1	0	1	1	1	0	1	1	0	1	0	0	0	1	0	1	1	0	1	0	0
AT1G63270	BraABCI22	6	0	0	0	0	0	0	1	0	0	0	1	0	1	1	1	0	1	0	0	0	0
AT3G10660	BraABCI15	10	0	0	1	1	1	0	0	1	0	1	0	0	1	0	0	1	0	1	0	1	1
AT3G10660	BraABCI11	10	0	0	1	1	1	0	0	1	0	1	0	0	1	0	0	1	0	1	0	1	1
AT4G33460	BraABCI1	7	1	0	0	0	0	1	1	1	1	1	0	0	1	0	0	0	0	0	0	0	0
AT1G03905	BraABCI21	10	0	0	1	1	0	1	1	0	0	1	1	0	0	0	1	1	1	0	0	0	1
AT5G44110	BraABCI24	6	1	1	0	0	0	0	1	0	0	0	0	1	0	0	0	1	0	0	1	0	0
AT5G02270	BraABCI8	10	0	1	0	0	0	0	0	0	0	1	1	1	1	1	0	0	1	1	1	0	1
AT5G02270	BraABCI29	10	0	1	0	0	0	0	0	0	0	1	1	1	1	1	0	0	1	1	1	0	1
AT3G09840	BraABCI10	5	1	0	0	1	0	0	0	0	1	1	1	0	0	0	0	0	0	0	0	0	0
AT3G53230	BraABCI18	5	0	0	0	0	0	1	0	0	0	0	0	1	0	0	0	0	0	1	1	0	1
AT5G03340	BraABCI9	7	1	0	0	0	0	1	1	0	0	1	1	0	0	0	0	1	0	0	0	1	0
AT3G53230	BraABCI26	5	0	0	0	0	0	1	0	0	0	0	0	1	0	0	0	0	0	1	1	0	1
AT1G32500	BraABCI17	5	0	0	0	0	0	0	1	1	0	0	0	0	0	0	0	1	1	0	0	0	1
AT1G15520	BraABCI27	6	1	1	1	1	0	0	0	0	1	0	0	0	0	0	1	0	0	0	0	0	0
AT3G09840	BraABCI16	5	1	0	0	1	0	0	0	0	1	1	1	0	0	0	0	0	0	0	0	0	0
AT3G28860	BraABCI7	11	1	0	1	1	0	0	1	1	1	1	1	0	1	0	0	1	1	0	0	0	0
AT1G67120	BraABCI6	13	0	1	1	1	1	1	1	1	0	1	1	1	0	0	0	0	1	1	0	0	1
AT3G09840	BraABCI4	5	1	0	0	1	0	0	0	0	1	1	1	0	0	0	0	0	0	0	0	0	0
AT3G20320	BraABCI14	7	0	0	0	1	0	0	0	1	1	1	1	1	1	0	0	0	0	0	0	0	0
tandem array(bpa)_tandem array(ath)	BraABCA4	5	1	0	0	1	1	0	0	0	0	0	0	0	0	0	0	0	0	1	1	0	0
tandem array(bpa)_tandem array(ath)	BraABCA9	4	0	0	0	0	0	0	1	0	0	0	1	0	0	0	0	0	0	0	0	1	1
tandem array(bpa)_tandem array(ath)	BraABCA3	5	1	0	0	1	1	0	0	0	0	0	0	0	0	0	0	0	0	1	1	0	0
tandem array(bpa)_tandem array(ath)	BraABCA6	4	0	0	0	0	0	0	1	0	0	0	1	0	0	0	0	0	0	0	0	1	1
tandem array(bpa)_tandem array(ath)	BraABCA1	4	0	0	0	0	0	0	1	0	0	0	1	0	0	0	0	0	0	0	0	1	1
tandem array(bpa)_tandem array(ath)	BraABCA8	4	0	0	0	0	0	0	1	0	0	0	1	0	0	0	0	0	0	0	0	1	1
tandem array(bpa)_tandem array(ath)	BraABCA7	4	0	0	0	0	0	0	1	0	0	0	1	0	0	0	0	0	0	0	0	1	1
tandem array(bpa)_tandem array(ath)	BraABCB20	7	0	0	0	0	0	0	1	0	1	0	1	0	0	1	0	0	1	1	0	1	0
tandem array(bpa)_tandem array(ath)	BraABCB19	7	0	0	0	0	0	0	1	0	1	0	1	0	0	1	0	0	1	1	0	1	0
tandem array(bpa)_tandem array(ath)	BraABCC15	14	1	1	0	1	1	1	0	1	0	1	1	1	1	0	1	1	0	1	1	0	0
tandem array(bpa)_tandem array(ath)	BraABCC14	14	1	1	0	1	1	1	0	1	0	1	1	1	1	0	1	1	0	1	1	0	0
tandem array(bpa)_tandem array(ath)	BraABCC2	14	1	0	0	1	1	1	1	0	1	0	1	0	1	0	1	1	1	1	1	0	1
tandem array(bpa)_tandem array(ath)	BraABCC3	14	1	0	0	1	1	1	1	0	1	0	1	0	1	0	1	1	1	1	1	0	1
tandem array(bpa)_tandem array(ath)	BraABCC20	15	1	0	0	1	1	1	1	0	1	0	1	0	1	0	1	1	1	1	1	1	1
tandem array(bpa)_tandem array(ath)	BraABCC21	13	0	0	0	1	1	1	1	0	1	0	1	0	1	0	1	1	1	1	1	0	1
tandem array(bpa)_tandem array(ath)	BraABCG12	5	0	0	0	0	0	0	0	1	0	0	1	1	0	0	1	0	1	0	0	0	0
tandem array(bpa)_tandem array(ath)	BraABCG14	8	1	1	0	0	0	0	0	1	1	0	1	0	1	0	1	0	1	0	0	0	0
tandem array(bpa)_tandem array(ath)	BraABCG15	8	1	1	0	0	0	0	0	1	1	0	1	0	1	0	1	0	1	0	0	0	0
tandem array(bpa)_tandem array(ath)	BraABCG16	8	1	1	0	0	0	0	0	1	1	0	1	0	1	0	1	0	1	0	0	0	0
tandem array(bpa)_tandem array(ath)	BraABCG17	8	1	1	0	0	0	0	0	1	1	0	1	0	1	0	1	0	1	0	0	0	0
tandem array(bpa)_tandem array(ath)	BraABCI20	10	0	1	1	0	0	0	0	1	0	1	1	1	0	0	1	0	1	0	0	1	1
tandem array(bpa)_tandem array(ath)	BraABCI3	4	0	0	0	0	0	0	1	0	0	0	1	0	0	0	0	0	0	0	0	1	1
single copy(bpa)_tandem array(ath)	BraABCA5	5	1	1	0	0	0	0	0	0	0	0	0	0	0	0	1	1	0	0	1	0	0
single copy(bpa)_tandem array(ath)	BraABCB25	6	0	1	1	0	0	0	0	0	0	0	1	0	0	1	0	0	0	1	0	1	0
single copy(bpa)_tandem array(ath)	BraABCB35	5	0	1	0	0	0	0	0	0	0	0	1	0	0	1	0	0	0	1	0	1	0
single copy(bpa)_tandem array(ath)	BraABCB3	6	0	0	0	0	0	0	0	0	1	0	1	0	1	0	0	1	0	0	1	1	0
single copy(bpa)_tandem array(ath)	BraABCB1	5	1	0	0	0	0	1	0	0	0	1	0	1	0	0	0	0	1	0	0	0	0
single copy(bpa)_tandem array(ath)	BraABCC12	15	1	1	0	1	1	1	0	1	1	1	1	1	1	0	1	1	0	1	1	0	0
single copy(bpa)_tandem array(ath)	BraABCC10	14	1	1	0	1	1	1	0	1	0	1	1	1	1	0	1	1	0	1	1	0	0
single copy(bpa)_tandem array(ath)	BraABCC8	14	1	0	0	1	1	1	1	0	1	0	1	0	1	0	1	1	1	1	1	0	1
single copy(bpa)_tandem array(ath)	BraABCG34	9	0	0	0	0	0	0	0	1	1	1	0	1	1	0	1	0	0	0	1	1	1
single copy(bpa)_tandem array(ath)	BraABCG47	8	1	1	0	0	0	0	0	1	1	0	1	0	1	0	1	0	1	0	0	0	0
single copy(bpa)_tandem array(ath)	BraABCG57	8	1	1	0	0	0	0	0	1	1	0	1	0	1	0	1	0	1	0	0	0	0
single copy(bpa)_tandem array(ath)	BraABCA10	4	0	0	0	0	0	0	1	0	0	0	1	0	0	0	0	0	0	0	0	1	1
tandem array(bpa)_single copy(AT5G46540)	BraABCB34	8	0	0	0	0	0	0	1	0	1	1	0	1	0	0	0	1	1	1	1	0	0
tandem array(bpa)_single copy(AT5G46540)	BraABCB33	8	0	0	0	0	0	0	1	0	1	1	0	1	0	0	0	1	1	1	1	0	0
tandem array(bpa)_single copy(AT1G27940)	BraABCB30	7	0	1	0	0	0	0	1	1	0	0	0	1	1	1	1	0	0	0	0	0	0
tandem array(bpa)_single copy(AT1G27940)	BraABCB31	7	0	1	0	0	0	0	1	1	0	0	0	1	1	1	1	0	0	0	0	0	0
tandem array(bpa)_single copy(AT3G28415)	BraABCB27	9	0	0	0	0	1	0	1	0	1	0	0	1	0	0	1	1	0	1	0	1	1
tandem array(bpa)_single copy(AT3G28415)	BraABCB26	9	0	0	0	0	1	0	1	0	1	0	0	1	0	0	1	1	0	1	0	1	1
tandem array(bpa)_single copy(AT1G27680)	BraABCE7	12	0	1	1	0	1	1	0	1	1	0	0	1	0	1	0	0	1	1	0	1	1
tandem array(bpa)_single copy(AT2G37280)	BraABCG28	13	1	0	1	1	1	0	0	1	0	1	1	0	1	1	1	0	1	1	0	1	0
tandem array(bpa)_single copy(AT1G27680)	BraABCG27	14	1	0	1	1	1	0	0	1	0	1	1	0	1	1	1	0	1	1	0	1	1
tandem array(bpa)_single copy(AT1G15210)	BraABCG39	8	0	1	0	0	1	1	0	0	1	0	1	0	1	0	0	0	0	1	1	0	0
tandem array(bpa)_single copy(AT1G15210)	BraABCG40	7	0	1	0	0	1	1	0	0	0	0	1	0	1	0	0	0	0	1	1	0	0
tandem array(bpa)_single copy(AT1G53400)	BraABCG37	8	1	0	1	0	1	0	1	0	1	0	0	0	0	1	1	0	0	1	0	0	0
tandem array(bpa)_single copy(AT1G53400)	BraABCG36	7	1	0	1	0	1	0	1	0	1	0	0	0	0	1	1	0	0	0	0	0	0
tandem array(bpa)_single copy(AT2G39350)	BraABCG25	9	0	0	0	0	1	0	0	1	0	1	0	1	1	1	0	1	0	1	0	0	1
tandem array(bpa)_single copy(AT2G39350)	BraABCG26	9	0	0	0	0	1	0	0	1	0	1	0	1	1	1	0	1	0	1	0	0	1
tandem array(bpa)_single copy(AT2G39350)	BraABCI13	9	0	0	0	0	1	0	0	1	0	1	0	1	1	1	0	1	0	1	0	0	1
single copy(bpa)_loss(ath)	BraABCA11	2	0	1	0	0	0	0	0	0	1	0	0	0	0	0	0	0	0	0	0	0	0
single copy(bpa)_loss(ath)	BraABCB37	5	0	0	0	0	1	1	0	1	0	1	0	0	0	0	0	0	0	0	1	0	0
single copy(bpa)_loss(ath)	BraABCB7	10	1	1	0	0	0	1	1	0	1	1	1	1	1	0	0	1	0	0	0	0	0
single copy(bpa)_loss(ath)	BraABCB16	12	1	0	0	0	1	1	1	1	1	1	0	0	1	0	1	0	0	1	1	1	0
single copy(bpa)_loss(ath)	BraABCB32	6	0	0	0	1	0	0	1	0	1	0	0	0	0	0	0	1	0	0	1	1	0
single copy(bpa)_loss(ath)	BraABCC9	11	0	0	0	0	1	1	1	1	0	0	0	1	0	1	0	1	1	1	1	1	0
single copy(bpa)_loss(ath)	BraABCC6	12	0	0	1	1	1	1	0	0	1	0	0	1	0	1	1	1	1	1	0	1	0
single copy(bpa)_loss(ath)	BraABCC13	12	0	0	1	1	1	1	1	0	1	0	1	1	0	1	0	0	1	0	0	1	1
single copy(bpa)_loss(ath)	BraABCC19	14	1	1	0	1	1	0	0	0	0	1	1	1	1	1	1	0	1	1	0	1	1
single copy(bpa)_loss(ath)	BraABCD1	9	0	1	1	1	0	0	1	0	0	1	0	0	1	0	0	0	0	1	1	1	0
single copy(bpa)_loss(ath)	BraABCE5	11	1	0	1	1	0	0	0	0	0	1	1	0	0	0	1	1	0	1	1	1	1
single copy(bpa)_loss(ath)	BraABCF1	6	1	1	1	0	0	0	0	0	0	0	0	0	0	0	0	0	1	1	1	0	0
single copy(bpa)_loss(ath)	BraABCG30	3	0	0	0	0	0	0	0	0	0	0	1	1	0	0	0	0	0	0	1	0	0
single copy(bpa)_loss(ath)	BraABCG48	1	0	0	1	0	0	0	0	0	0	0	0	0	0	0	0	0	0	0	0	0	0
single copy(bpa)_loss(ath)	BraABCG8	7	0	0	0	0	0	0	0	0	1	1	1	1	0	0	0	1	0	0	0	1	1
single copy(bpa)_loss(ath)	BraABCG62	3	0	0	0	0	0	0	0	0	0	0	0	0	0	1	0	0	1	0	1	0	0
single copy(bpa)_loss(ath)	BraABCG58	9	0	0	0	0	0	1	1	0	0	1	0	1	0	1	0	1	0	1	0	1	1
single copy(bpa)_loss(ath)	BraABCI12	3	0	0	0	1	0	0	0	1	0	0	0	0	0	0	0	0	0	1	0	0	0
single copy(bpa)_loss(ath)	BraABCI23	8	0	1	1	0	0	1	1	0	1	0	0	0	0	0	0	1	1	1	0	0	0
MF2
Collinear correlations	BrABC gene	Retained	10	9	8	7	6	5	4	3	2	1	0	1	2	3	4	5	6	7	8	9	10
AT3G60966	BraABCB21	8	1	1	1	1	0	0	0	0	0	0	1	0	0	0	0	0	0	1	1	0	1
AT3G28415	BraABCB18	3	0	0	0	0	0	1	0	0	0	0	1	0	0	0	0	0	0	0	0	1	0
AT4G18050	BraABCC4	4	0	0	0	0	0	0	0	0	0	1	0	0	1	0	0	1	0	0	0	0	1
AT3G13640	BraABCE2	9	0	0	0	0	1	0	1	1	1	0	1	1	1	1	0	0	0	0	0	1	0
AT3G13640	BraABCE3	9	0	0	0	0	1	0	1	1	1	0	1	1	1	1	0	0	0	0	0	1	0
AT2G37280	BraABCG23	11	1	1	0	1	1	1	0	1	1	1	0	0	0	0	0	1	0	0	1	0	1
AT1G15210	BraABCG54	7	1	0	0	1	0	1	0	0	0	1	0	0	0	0	1	0	1	1	0	0	0
AT5G13580	BraABCG60	14	1	1	1	1	1	1	0	0	1	1	0	1	1	0	1	0	1	1	0	1	0
AT4G04770	BraABCI25	5	0	1	0	0	0	0	1	0	0	1	0	1	0	0	0	0	0	0	0	1	0
AT4G14370	BraABCI2	6	0	1	1	1	0	0	0	0	0	0	0	0	0	0	0	0	1	1	0	1	0
AT2G41700	BraABCA2	9	0	0	0	1	0	0	1	0	1	1	1	0	1	0	0	1	0	1	1	0	0
AT2G47000	BraABCB13	7	0	0	0	0	1	0	1	1	0	0	0	0	0	1	1	0	0	0	0	1	1
AT2G47000	BraABCB12	7	0	0	0	0	1	0	1	1	0	0	0	0	0	1	1	0	0	0	0	1	1
AT3G62150	BraABCB23	10	0	0	1	0	0	0	0	1	1	0	1	1	1	1	1	1	0	1	0	0	0
AT4G25960	BraABCB8	1	0	0	1	0	0	0	0	0	0	0	0	0	0	0	0	0	0	0	0	0	0
AT1G10680	BraABCB15	8	0	1	1	0	1	0	0	0	0	0	0	0	0	1	0	1	1	1	0	0	1
AT2G36910	BraABCB11	8	0	0	0	1	1	0	0	1	1	0	1	0	0	1	0	1	0	0	0	1	0
AT2G36910	BraABCB5	8	0	0	0	1	1	0	0	1	1	0	1	0	0	1	0	1	0	0	0	1	0
AT3G28860	BraABCB17	11	1	0	0	1	1	0	0	1	1	1	1	0	0	0	0	1	1	1	0	1	0
AT3G28860	BraABCB28	11	1	0	0	1	1	0	0	1	1	1	1	0	0	0	0	1	1	1	0	1	0
AT4G25960	BraABCB2	1	0	0	1	0	0	0	0	0	0	0	0	0	0	0	0	0	0	0	0	0	0
AT1G28010	BraABCB29	6	0	1	0	1	0	1	0	0	0	0	0	0	0	0	1	0	1	0	0	1	0
AT2G39480	BraABCB6	6	1	1	0	1	1	0	0	0	1	0	1	0	0	0	0	0	0	0	0	0	0
AT2G39480	BraABCB14	5	1	1	0	0	1	0	0	0	1	0	1	0	0	0	0	0	0	0	0	0	0
AT3G55320	BraABCB9	2	0	1	0	0	1	0	0	0	0	0	0	0	0	0	0	0	0	0	0	0	0
AT1G70610	BraABCB22	6	0	0	0	0	0	0	0	0	0	1	1	0	0	0	0	0	1	0	1	1	1
AT4G25450	BraABCB24	7	0	0	0	0	1	0	1	0	0	0	1	1	1	0	1	0	0	1	0	0	0
AT5G39040	BraABCB10	8	1	1	1	0	0	0	0	0	1	1	0	0	0	1	0	0	1	0	1	0	0
AT5G03910	BraABCB38	8	0	0	1	1	1	1	0	0	1	1	0	0	1	0	1	0	0	0	0	0	0
AT5G58270	BraABCB4	13	1	1	1	1	0	1	1	0	0	0	0	0	1	1	1	1	1	1	1	0	0
AT5G58270	BraABCB36	13	1	1	1	1	0	1	1	0	0	0	0	0	1	1	1	1	1	1	1	0	0
AT2G34660	BraABCC5	8	0	0	0	1	0	0	1	0	0	0	0	1	1	1	0	0	0	1	1	1	0
AT3G21250	BraABCC7	7	1	0	0	0	0	0	0	0	1	1	0	0	1	0	0	1	0	0	1	1	0
AT3G21250	BraABCC1	7	1	0	0	0	0	0	0	0	1	1	0	0	1	0	0	1	0	0	1	1	0
AT3G59140	BraABCC16	11	0	1	1	1	0	1	1	1	0	1	0	0	1	1	0	1	0	0	0	1	0
AT3G62700	BraABCC17	9	0	0	1	0	1	0	0	0	0	1	0	1	1	0	1	1	0	1	0	0	1
AT3G60160	BraABCC11	7	0	0	1	1	0	1	0	1	0	0	1	0	1	0	0	1	0	0	0	0	0
AT1G04120	BraABCC18	10	1	1	0	1	0	0	0	0	0	0	0	1	1	1	1	1	0	1	0	0	1
AT4G39850	BraABCD2	10	0	1	1	0	0	0	1	1	0	1	1	0	0	0	0	1	1	0	1	0	1
AT4G19210	BraABCE1	8	0	0	1	1	1	0	1	0	1	1	1	0	0	0	0	0	0	0	0	1	0
AT4G19210	BraABCE4	8	0	0	1	1	1	0	1	0	1	1	1	0	0	0	0	0	0	0	0	1	0
AT4G19210	BraABCE6	8	0	0	1	1	1	0	1	0	1	1	1	0	0	0	0	0	0	0	0	1	0
AT5G64840	BraABCF2	6	0	0	0	1	0	1	1	0	0	0	0	1	1	0	0	0	0	0	1	0	0
AT3G54540	BraABCF4	5	0	0	0	0	1	1	0	0	1	0	0	0	0	1	0	0	1	0	0	0	0
AT1G64550	BraABCF5	7	0	1	0	1	0	1	0	0	0	0	0	0	0	1	1	0	0	1	0	1	0
AT5G60790	BraABCF3	13	1	1	1	1	0	1	0	1	1	1	0	1	1	0	0	0	1	1	0	1	0
AT3G54540	BraABCF6	5	0	0	0	0	1	1	0	0	1	0	0	0	0	1	0	0	1	0	0	0	0
AT5G09930	BraABCF7	7	0	0	1	0	0	1	0	1	0	1	0	1	0	1	0	0	1	0	0	0	0
AT3G53480	BraABCG46	11	1	1	1	0	1	1	0	0	0	1	1	0	1	1	0	1	0	1	0	0	0
AT3G30842	BraABCG43	1	0	0	0	0	1	0	0	0	0	0	0	0	0	0	0	0	0	0	0	0	0
AT2G26910	BraABCG19	3	0	0	1	0	0	0	0	0	0	0	0	0	0	0	1	0	0	0	1	0	0
AT1G15520	BraABCG41	9	0	1	0	0	0	1	0	0	0	0	1	1	0	1	1	1	1	0	0	1	0
AT2G36380	BraABCG22	10	1	1	1	1	0	0	0	0	0	0	1	0	1	1	1	0	0	1	0	1	0
AT2G36380	BraABCG9	10	1	1	1	1	0	0	0	0	0	0	1	0	1	1	1	0	0	1	0	1	0
AT3G16340	BraABCG3	7	1	0	0	0	0	0	1	0	0	1	0	0	1	0	0	1	0	0	0	1	1
AT3G16340	BraABCG35	7	1	0	0	0	0	0	1	0	0	1	0	0	1	0	0	1	0	0	0	1	1
AT2G29940	BraABCG10	7	0	0	0	0	0	0	0	0	1	0	1	1	0	0	1	1	0	1	0	1	0
AT2G29940	BraABCG21	7	0	0	0	0	0	0	0	0	1	0	1	1	0	0	1	1	0	1	0	1	0
AT2G37010	BraABCG29	9	0	1	0	1	0	0	0	1	0	0	0	1	1	1	0	0	1	1	0	1	0
AT1G53390	BraABCG31	7	0	0	0	0	0	0	0	1	0	0	1	1	1	0	0	0	0	1	1	1	0
AT1G31770	BraABCG55	7	0	0	0	1	1	0	0	0	0	1	1	0	0	1	0	0	1	0	1	0	0
AT1G31770	BraABCG33	7	0	0	0	1	1	0	0	0	0	1	1	0	0	1	0	0	1	0	1	0	0
AT3G25620	BraABCG7	4	0	0	0	0	0	0	1	0	1	0	0	0	0	0	1	0	1	0	0	0	0
AT3G25620	BraABCG44	4	0	0	0	0	0	0	1	0	1	0	0	0	0	0	1	0	1	0	0	0	0
AT4G27420	BraABCG13	5	0	0	0	0	0	0	0	1	0	0	0	0	0	0	1	0	1	1	0	1	0
AT4G27420	BraABCG2	5	0	0	0	0	0	0	0	1	0	0	0	0	0	0	1	0	1	1	0	1	0
AT1G71960	BraABCG50	9	0	1	0	1	0	1	0	0	1	0	1	1	0	0	0	0	1	1	0	1	0
AT1G71960	BraABCG49	8	0	1	0	0	0	1	0	0	1	0	1	1	0	0	0	0	1	1	0	1	0
AT1G71960	BraABCG6	9	0	1	0	1	0	1	0	0	1	0	1	1	0	0	0	0	1	1	0	1	0
AT3G52310	BraABCG18	9	1	0	1	0	1	0	0	0	0	1	0	0	1	0	1	1	1	1	0	0	0
AT5G06530	BraABCG4	7	0	0	0	0	0	1	1	1	0	0	1	0	0	1	0	0	0	1	0	1	0
AT5G06530	BraABCG61	7	0	0	0	0	0	1	1	1	0	0	1	0	0	1	0	0	0	1	0	1	0
AT3G13220	BraABCG63	7	1	1	0	1	0	0	0	0	1	0	0	0	0	1	0	0	0	1	0	1	0
AT5G19410	BraABCG59	9	0	1	0	0	0	1	1	1	1	1	0	0	0	0	1	0	0	0	1	0	1
AT2G01320	BraABCG52	7	0	0	1	0	0	1	0	0	1	0	0	1	1	0	0	0	0	0	1	0	1
AT2G13610	BraABCG11	4	0	0	0	1	0	0	0	0	1	1	1	0	0	0	0	0	0	0	0	0	0
AT1G53270	BraABCG51	8	1	1	1	1	1	0	1	0	0	0	0	0	0	1	1	0	0	0	0	0	0
AT4G25750	BraABCG1	5	0	1	0	0	0	0	1	0	1	1	0	0	0	1	0	0	0	0	0	0	0
AT5G52860	BraABCG5	12	1	1	1	0	1	0	1	1	1	0	1	1	0	0	1	1	0	0	1	0	0
AT2G28070	BraABCG45	3	0	0	0	0	0	1	0	0	0	0	0	0	1	0	0	1	0	0	0	0	0
AT2G28070	BraABCG20	3	0	0	0	0	0	1	0	0	0	0	0	0	1	0	0	1	0	0	0	0	0
AT1G17840	BraABCG53	5	0	0	0	0	0	1	0	1	1	0	0	0	0	0	1	0	0	0	0	0	1
AT1G17840	BraABCG42	5	0	0	0	0	0	1	0	1	1	0	0	0	0	0	1	0	0	0	0	0	1
AT1G51460	BraABCG38	6	0	0	0	0	0	1	1	0	0	0	0	1	0	1	1	0	0	0	0	1	0
AT1G51500	BraABCG32	6	0	0	0	1	1	0	0	0	1	0	1	1	0	0	0	0	1	0	0	0	0
AT3G53510	BraABCG56	14	1	1	0	1	1	1	0	1	1	0	0	1	1	1	0	1	1	0	1	0	1
AT2G37360	BraABCG24	8	0	1	1	1	0	0	0	0	0	1	0	0	1	0	1	0	0	0	0	1	1
AT1G67940	BraABCI19	8	0	0	1	0	1	0	1	1	1	0	0	0	0	0	0	1	1	1	0	0	0
AT1G65410	BraABCI5	0	0	0	0	0	0	0	0	0	0	0	0	0	0	0	0	0	0	0	0	0	0
AT5G14100	BraABCI28	7	1	0	0	1	1	1	0	1	0	0	0	0	0	0	1	0	0	0	0	0	1
AT1G63270	BraABCI22	10	1	0	0	0	0	0	1	1	1	0	0	1	0	1	0	0	1	0	1	1	1
AT3G10660	BraABCI15	9	0	1	0	0	0	0	0	0	1	1	1	0	0	1	0	1	0	1	0	1	1
AT3G10660	BraABCI11	9	0	1	0	0	0	0	0	0	1	1	1	0	0	1	0	1	0	1	0	1	1
AT4G33460	BraABCI1	6	0	0	1	0	1	0	1	1	0	1	0	0	0	0	0	0	0	0	0	1	0
AT1G03905	BraABCI21	7	0	0	0	0	1	1	1	0	1	0	0	1	0	1	0	0	0	0	1	0	0
AT5G44110	BraABCI24	10	1	0	0	0	1	0	1	0	1	1	1	0	1	0	1	0	1	0	0	0	1
AT5G02270	BraABCI8	5	0	0	1	0	0	1	1	0	0	1	0	0	0	1	0	0	0	0	0	0	0
AT5G02270	BraABCI29	5	0	0	1	0	0	1	1	0	0	1	0	0	0	1	0	0	0	0	0	0	0
AT3G09840	BraABCI10	5	0	0	0	0	0	0	1	0	0	0	1	0	0	0	0	1	1	0	0	0	1
AT3G53230	BraABCI18	11	1	1	0	1	1	1	1	0	1	0	1	0	0	1	1	1	0	0	0	0	0
AT5G03340	BraABCI9	8	0	1	0	0	0	1	1	1	1	1	0	0	1	0	0	1	0	0	0	0	0
AT3G53230	BraABCI26	11	1	1	0	1	1	1	1	0	1	0	1	0	0	1	1	1	0	0	0	0	0
AT1G32500	BraABCI17	8	0	0	0	0	1	1	1	1	0	1	1	0	0	0	1	0	0	0	0	1	0
AT1G15520	BraABCI27	9	0	1	0	0	0	1	0	0	0	0	1	1	0	1	1	1	1	0	0	1	0
AT3G09840	BraABCI16	5	0	0	0	0	0	0	1	0	0	0	1	0	0	0	0	1	1	0	0	0	1
AT3G28860	BraABCI7	11	1	0	0	1	1	0	0	1	1	1	1	0	0	0	0	1	1	1	0	1	0
AT1G67120	BraABCI6	0	0	0	0	0	0	0	0	0	0	0	0	0	0	0	0	0	0	0	0	0	0
AT3G09840	BraABCI4	5	0	0	0	0	0	0	1	0	0	0	1	0	0	0	0	1	1	0	0	0	1
AT3G20320	BraABCI14	8	0	0	1	1	1	0	0	0	1	1	0	0	0	0	1	0	0	1	0	0	1
tandem array(bpa)_tandem array(ath)	BraABCA4	6	0	1	0	0	0	0	0	0	1	1	0	0	0	0	0	1	1	0	1	0	0
tandem array(bpa)_tandem array(ath)	BraABCA9	6	0	1	0	0	0	0	0	0	1	0	1	0	0	0	0	0	0	0	1	1	1
tandem array(bpa)_tandem array(ath)	BraABCA3	6	1	0	0	0	0	0	0	1	1	0	0	0	0	0	0	1	1	0	1	0	0
tandem array(bpa)_tandem array(ath)	BraABCA6	6	0	1	0	0	0	0	0	0	1	0	1	0	0	0	0	0	0	0	1	1	1
tandem array(bpa)_tandem array(ath)	BraABCA1	6	0	0	1	0	0	0	0	0	1	0	1	0	0	0	0	0	0	0	1	1	1
tandem array(bpa)_tandem array(ath)	BraABCA8	6	0	1	0	0	0	0	0	0	1	0	1	0	0	0	0	0	0	0	1	1	1
tandem array(bpa)_tandem array(ath)	BraABCA7	6	0	1	0	0	0	0	0	0	1	0	1	0	0	0	0	0	0	0	1	1	1
tandem array(bpa)_tandem array(ath)	BraABCB20	2	0	0	0	0	0	0	0	1	0	0	0	0	1	0	0	0	0	0	0	0	0
tandem array(bpa)_tandem array(ath)	BraABCB19	2	0	0	0	0	0	0	0	1	0	0	0	0	1	0	0	0	0	0	0	0	0
tandem array(bpa)_tandem array(ath)	BraABCC15	8	1	1	0	0	0	0	0	0	1	0	1	0	1	0	1	1	0	1	0	0	0
tandem array(bpa)_tandem array(ath)	BraABCC14	8	1	1	0	0	0	0	0	0	1	0	1	0	1	0	1	1	0	1	0	0	0
tandem array(bpa)_tandem array(ath)	BraABCC2	11	1	0	1	0	1	1	0	1	0	1	1	0	1	1	0	1	0	0	0	0	1
tandem array(bpa)_tandem array(ath)	BraABCC3	11	1	0	1	0	1	1	0	1	0	1	1	0	1	1	0	1	0	0	0	0	1
tandem array(bpa)_tandem array(ath)	BraABCC20	11	1	0	1	0	1	1	0	1	0	1	1	0	1	1	0	1	0	0	0	0	1
tandem array(bpa)_tandem array(ath)	BraABCC21	11	1	0	1	0	1	1	0	1	0	1	1	0	1	1	0	1	0	0	0	0	1
tandem array(bpa)_tandem array(ath)	BraABCG12	4	0	1	0	0	1	0	1	0	0	1	0	0	0	0	0	0	0	0	0	0	0
tandem array(bpa)_tandem array(ath)	BraABCG14	6	0	0	0	0	0	0	0	0	0	1	1	0	0	1	0	0	1	0	1	1	0
tandem array(bpa)_tandem array(ath)	BraABCG15	6	0	0	0	0	0	0	0	0	0	1	1	0	0	1	0	0	1	0	1	1	0
tandem array(bpa)_tandem array(ath)	BraABCG16	6	0	0	0	0	0	0	0	0	0	1	1	0	0	1	0	0	1	0	1	1	0
tandem array(bpa)_tandem array(ath)	BraABCG17	6	0	0	0	0	0	0	0	0	0	1	1	0	0	1	0	0	1	0	1	1	0
tandem array(bpa)_tandem array(ath)	BraABCI20	4	0	0	0	0	0	0	0	1	0	1	1	0	0	0	0	0	0	0	0	1	0
tandem array(bpa)_tandem array(ath)	BraABCI3	6	0	1	0	0	0	0	0	0	1	0	1	0	0	0	0	0	0	0	1	1	1
single copy(bpa)_tandem array(ath)	BraABCA5	5	0	0	0	0	1	1	0	0	0	0	0	0	1	1	0	1	0	0	0	0	0
single copy(bpa)_tandem array(ath)	BraABCB25	6	0	1	0	1	1	1	1	0	0	0	0	0	0	0	0	1	0	0	0	0	0
single copy(bpa)_tandem array(ath)	BraABCB35	7	0	1	1	1	1	1	1	0	0	0	0	0	0	0	0	1	0	0	0	0	0
single copy(bpa)_tandem array(ath)	BraABCB3	2	0	0	0	0	0	0	0	0	0	1	0	0	0	0	1	0	0	0	0	0	0
single copy(bpa)_tandem array(ath)	BraABCB1	6	1	1	0	0	0	0	0	1	1	1	0	0	0	0	0	0	0	0	0	0	1
single copy(bpa)_tandem array(ath)	BraABCC12	8	1	1	0	0	0	0	0	0	1	0	1	0	1	0	1	1	0	1	0	0	0
single copy(bpa)_tandem array(ath)	BraABCC10	8	1	1	0	0	0	0	0	0	1	0	1	0	1	0	1	1	0	1	0	0	0
single copy(bpa)_tandem array(ath)	BraABCC8	11	1	0	1	0	1	1	0	1	0	1	1	0	1	1	0	1	0	0	0	0	1
single copy(bpa)_tandem array(ath)	BraABCG34	7	1	0	0	0	0	0	0	1	0	1	0	0	1	0	1	1	1	0	0	0	0
single copy(bpa)_tandem array(ath)	BraABCG47	6	0	0	0	0	0	0	0	0	0	1	1	0	0	1	0	0	1	0	1	0	1
single copy(bpa)_tandem array(ath)	BraABCG57	6	0	0	0	0	0	0	0	0	0	1	1	0	0	1	0	0	1	0	1	1	0
single copy(bpa)_tandem array(ath)	BraABCA10	6	0	1	0	0	0	0	0	0	1	0	1	0	0	0	0	0	0	0	1	1	1
tandem array(bpa)_single copy(AT5G46540)	BraABCB34	7	0	0	0	0	1	0	1	0	0	1	1	0	0	0	0	0	0	0	1	1	1
tandem array(bpa)_single copy(AT5G46540)	BraABCB33	7	0	0	0	0	1	0	1	0	0	1	1	0	0	0	0	0	0	0	1	1	1
tandem array(bpa)_single copy(AT1G27940)	BraABCB30	4	0	0	0	0	1	0	0	0	0	1	0	1	0	1	0	0	0	0	0	0	0
tandem array(bpa)_single copy(AT1G27940)	BraABCB31	4	0	0	0	0	1	0	0	0	0	1	0	1	0	1	0	0	0	0	0	0	0
tandem array(bpa)_single copy(AT3G28415)	BraABCB27	4	0	0	0	0	0	1	0	0	0	0	1	0	0	0	0	0	0	0	0	1	1
tandem array(bpa)_single copy(AT3G28415)	BraABCB26	4	0	0	0	0	0	1	0	0	0	0	1	0	0	0	0	0	0	0	0	1	1
tandem array(bpa)_single copy(AT1G27680)	BraABCE7	7	0	0	1	0	0	1	0	1	0	0	0	0	0	1	1	1	0	1	0	0	0
tandem array(bpa)_single copy(AT2G37280)	BraABCG28	11	1	1	0	1	1	1	0	1	1	1	0	0	0	0	0	1	0	0	1	0	1
tandem array(bpa)_single copy(AT1G27680)	BraABCG27	11	1	1	0	1	1	1	0	1	1	1	0	0	0	0	0	1	0	0	1	0	1
tandem array(bpa)_single copy(AT1G15210)	BraABCG39	7	1	0	0	1	0	1	0	0	0	1	0	0	0	0	1	0	1	1	0	0	0
tandem array(bpa)_single copy(AT1G15210)	BraABCG40	7	1	0	0	1	0	1	0	0	0	1	0	0	0	0	1	0	1	1	0	0	0
tandem array(bpa)_single copy(AT1G53400)	BraABCG37	7	0	0	0	0	0	0	1	0	0	1	1	1	0	0	0	0	1	1	1	0	0
tandem array(bpa)_single copy(AT1G53400)	BraABCG36	6	0	0	0	0	0	0	1	0	0	1	1	1	0	0	0	0	1	0	1	0	0
tandem array(bpa)_single copy(AT2G39350)	BraABCG25	9	0	0	1	0	0	1	1	1	0	0	0	1	0	0	1	1	0	1	1	0	0
tandem array(bpa)_single copy(AT2G39350)	BraABCG26	9	0	0	1	0	0	1	1	1	0	0	0	1	0	0	1	1	0	1	1	0	0
tandem array(bpa)_single copy(AT2G39350)	BraABCI13	9	0	0	1	0	0	1	1	1	0	0	0	1	0	0	1	1	0	1	1	0	0
single copy(bpa)_loss(ath)	BraABCA11	8	1	0	0	0	1	1	1	1	0	0	0	1	0	0	0	1	0	0	1	0	0
single copy(bpa)_loss(ath)	BraABCB37	4	1	0	0	1	0	0	0	0	0	0	0	0	0	0	1	0	0	0	0	1	0
single copy(bpa)_loss(ath)	BraABCB7	4	0	0	0	0	0	0	0	0	1	0	0	0	1	0	0	1	0	0	0	0	1
single copy(bpa)_loss(ath)	BraABCB16	5	0	0	0	1	1	0	0	0	0	1	0	0	1	0	1	0	0	0	0	0	0
single copy(bpa)_loss(ath)	BraABCB32	9	1	0	1	0	1	0	0	0	0	0	1	1	0	1	1	0	0	1	1	0	0
single copy(bpa)_loss(ath)	BraABCC9	4	0	0	0	0	0	0	0	1	0	0	0	0	1	1	0	1	0	0	0	0	0
single copy(bpa)_loss(ath)	BraABCC6	6	0	0	0	0	0	1	0	0	0	1	1	1	0	1	0	0	0	0	0	0	1
single copy(bpa)_loss(ath)	BraABCC13	6	0	0	1	0	1	0	0	0	1	0	0	1	1	0	0	0	0	0	0	1	0
single copy(bpa)_loss(ath)	BraABCC19	8	1	1	0	1	1	0	0	0	1	0	0	0	1	1	0	0	1	0	0	0	0
single copy(bpa)_loss(ath)	BraABCD1	9	1	1	0	0	1	1	1	0	0	0	0	1	0	0	1	0	1	1	0	0	0
single copy(bpa)_loss(ath)	BraABCE5	8	0	0	0	0	1	1	1	1	0	0	0	0	0	0	0	1	0	1	1	1	0
single copy(bpa)_loss(ath)	BraABCF1	8	1	0	0	0	1	0	0	1	0	1	1	1	0	1	1	0	0	0	0	0	0
single copy(bpa)_loss(ath)	BraABCG30	0	0	0	0	0	0	0	0	0	0	0	0	0	0	0	0	0	0	0	0	0	0
single copy(bpa)_loss(ath)	BraABCG48	13	1	0	1	1	0	0	1	0	0	0	1	1	1	1	1	1	1	0	1	1	0
single copy(bpa)_loss(ath)	BraABCG8	9	0	0	1	0	1	1	0	0	0	0	0	0	1	1	1	1	0	0	0	1	1
single copy(bpa)_loss(ath)	BraABCG62	1	0	0	0	0	0	0	0	0	0	0	0	0	0	1	0	0	0	0	0	0	0
single copy(bpa)_loss(ath)	BraABCG58	6	1	1	0	0	0	0	0	0	0	0	0	0	0	0	0	1	0	1	0	1	1
single copy(bpa)_loss(ath)	BraABCI12	0	0	0	0	0	0	0	0	0	0	0	0	0	0	0	0	0	0	0	0	0	0
single copy(bpa)_loss(ath)	BraABCI23	9	1	0	0	0	0	0	1	1	0	1	1	1	1	1	0	0	0	1	0	0	0

## Sheet: S3
Supplementary Table 3 Unique cis-elements identified only in the promoter sequence of a single BraABC.
Cis-element name	Signal Sequence	SITE	Expression pattern	Gene
ACEATCHS	GACACGTAGA	S000355	Leaf, shoot, light	BraABCA3
GMHDLGMVSPB	CATTAATTAG	S000372	Phosphate response	BraABCA6
SGBFGMGMAUX28	TCCACGTGTC	S000287	Auxin	BraABCA8
C1MOTIFZMBZ2	TAACTSAGTTA	S000237	seed, glutathione S-transferase	BraABCA9
RBCSBOX3PS	ATCATTTTCACT	S000095	Leaf, shoot, light,	BraABCB2
TOPOISOM	GTNWAYATTNATNNG	S000112	Topoisomerase	BraABCB10
GBOXPC	ACCACGTGGC	S000324	Leaf, shoot, light	BraABCB10
B2GMAUX28	CTTGTCGTCA	S000325	Auxin	BraABCB15
LS5ATPR1	TCTACGTCAC	S000323	Root, auxin, SA, defense response	BraABCB19
SITEIOSPCNA	CCAGGTGG	S000224	Meristem	BraABCB38
AMMORESVDCRNIA1	GGCCCCGGG	S000376	Ammonium response	BraABCC8
AGL1ATCONSENSUS	NTTDCCWWWWNNGGWAAN	S000338	Leaf, shoot, flower, GA, light, root, floral induction	BraABCD2
DREDR1ATRD29AB	TACCGACAT	S000152	Leaf, shoot, drought, oxidative, low temperature, high salt	BraABCE2
ABREDISTBBNNAPA	GCCACTTGTC	S000262	Seed, ABA	BraABCF2
ACGTSEED3	GTACGTGGCG	S000019	Seed, embryogenesis and germination	BraABCF3
ABREMOTIFIOSRAB16B	AGTACGTGGC	S000290	ABA	BraABCF3
VOZATVPP	GCGTNNNNNNNACGC	S000456	Pollen	BraABCF3
CAATBOX2	GGCCAATCT	S000029	Eukaryotic genes	BraABCF5
HDMOTIFPCPR2	CTAATTGTTTA	S000233	Pathogen defense	BraABCG10
WINPSTPIIIK	AAGCGTAAGT	S000495	Wound	BraABCG18
O2F3BE2S1	TCCACGTACT	S000164	Seed, storage protein	BraABCG18
LREBOXIIPCCHS1	TCCACGTGGC	S000303	Leaf, shoot, light,	BraABCG21
SORLREP5AT	TTGCATGACT	S000490	Light, phytochrome	BraABCG25
ELRENTCHN50	GGTCANNNAGTC	S000155	Elicitor-response, chitinase	BraABCG26
AGL3ATCONSENSUS	TTWCYAWWWWTRGWAA	S000343	Stem, leaf, flower, shoot	BraABCG29
GLUTECOREOS	CTTTCGTGTAC	S000050	Seed, glutelin	BraABCG32
D3GMAUX28	TATTTGCTTAA	S000330	Auxin	BraABCG34
UPRE2AT	CCACGTCATC	S000429	Unfolded protein response	BraABCG36
JASE1ATOPR1	CGTCAATGAA	S000388	Leaf, JA, senescence	BraABCG44
E2FBNTRNR	GCGGCAAA	S000367	Cell cycle, UV-C	BraABCG61
DR5GMGH3	CCTTTTGTCTC	S000337	Auxin	BraABCI2
BBOXSITE1STPAT	GCTAAACAAT	S000398	Tuber, sucrose-inducible	BraABCI4
BOX1PSGS2	ATAGAAATCAA	S000222	Light, glutamine synthetase	BraABCI5
PE2FNTRNR1A	ATTCGCGC	S000455	UV-C response, cell cycle	BraABCI12
ABREA2HVA1	CCTACGTGGC	S000140	Seed, ABA, stress response	BraABCI15
GT2OSPHYA	GCGGTAATT	S000207	Leaf, shoot, light	BraABCI16
GRAZMRAB28	CATGCCGCC	S000220	Seed, ABA	BraABCI18
CONSERVED11NTZMATP1	ACGTATTAAAA	S000301	Mitochondria, atp1	BraABCI24
SPHZMC1	CGTCCATGCAT	S000293	Seed, ABA, light, anthocyanin pathway	BraABCI28
OPAQUE2ZM22Z	TCCACGTAGA	S000017	Seed, O2 target, embryogenesis and germination	BraABCI30

## Sheet: S4
Supplementary Table 4 Primers for quantitative real-time PCR of syntenic BraABC paralog pairs.
Syntenic paralogs pairs	Gene	Sense primer(5'->3')	Anti-sense primer(5'->3')
1	BraABCB13	GAAGTCGTTGGAAGAATGTC	ACAAGAAGAGGTATTGAAGATAAC
	BraABCB12	GTCTACCGTTGTGAGTCTAA	AGTCCAATCTTGCTTCTGAT
2	BraABCB11	AAGAATAGCCATAGCAAGAG	GATGAGCAATGATGAGAGTC
	BraABCB5	GGTCCTAAGCATCTACTACA	GAATATAAGAGCCGCAGAAG
3	BraABCG45	GTGCCTATTGGTGAATGAAG	GTGTGGAATGAGATGTAAGC
	BraABCG20	ATCTCTACCGTTCATCTTCAT	TTCTTCATCCATTCTTACATCAG
4	BraABCG3	CCGATGAAGATAACGAGAAG	TAAGGCAACATTAGGTAACG
	BraABCG35	AGCATTCCTATCTCCATCTT	CTCCAGTATTAGCAAGTATCATT
5	BraABCC7	TGGAGTGGTGACAATAAGAG	GGAATAAGGATAAGCAGAAGTG
	BraABCC1	TTACACAAGAGGAAGAAGTAGA	ATACGGTTGCTGATAGAAGA
6	BraABCG10	ATGTATTCTCCAATTCCGTATG	CAATGGTGAAGTAAGTGATGA
	BraABCG21	CTGGTATTGGATTGGAGTTG	TCTCACTTCTTCCTTGTCTT
Actin	Bra028615	CTCAGTCCAAAAGAGGTATTCT	GTAGAATGTGTGATGCCAGATC
